# Supplementary material
Source: PubMed Central journal article supplement (PMC3352534)
Supplement: eva0004-0648-SD4.pdf [file eva0004-0648-SD4.pdf]

**Table S2. Expected segregation per locus.** Expectations are based on extrapolations from the observed segregation in the control generation using ratios provided in Table S1, i.e. if the control generation has skewed segregation under a no mortality situation this is expected to be intrinsic to the cross and to occur similar in the field grown generations. Therefore, mendelian segregation is only given for comparison.

|           |                                   | S <sub>1</sub>                       | S <sub>1</sub> | S <sub>1</sub>   | BC <sub>1</sub>    | BC <sub>1</sub> | BC <sub>1</sub>  | BC <sub>1S1</sub>  | BC <sub>1S1</sub> | BC <sub>1S1</sub> |       |       |       |
|-----------|-----------------------------------|--------------------------------------|----------------|------------------|--------------------|-----------------|------------------|--------------------|-------------------|-------------------|-------|-------|-------|
|           |                                   | <i>L. serriola</i>                   | Hetero-zygous  | <i>L. sativa</i> | <i>L. serriola</i> | Hetero-zygous   | <i>L. sativa</i> | <i>L. serriola</i> | Hetero-zygous     | <i>L. sativa</i>  |       |       |       |
| Mendelian | Co-dominant                       | 0.25                                 | 0.5            | 0.25             | 0.5                | 0.5             | -                | 0.625              | 0.25              | 0.125             |       |       |       |
| Mendelian | Dominant: <i>L. serriola</i> band | 0.75                                 | -              | 0.25             | -                  | -               | -                | 0.875              | -                 | 0.125             |       |       |       |
| Mendelian | Dominant: <i>L. sativa</i> band   | 0.25                                 | -              | 0.75             | 0.5                | -               | 0.5              | 0.625              | -                 | 0.375             |       |       |       |
| LG        | cMorgan                           | Loci (incl band presence state)      |                | Marker type      |                    |                 |                  |                    |                   |                   |       |       |       |
| 1         | 4.1                               | E35/M59-F-127 ( <i>L. serriola</i> ) |                | AFLP             | 0.263              | 0.525           | 0.213            | 0.500              | 0.500             | -                 | 0.631 | 0.263 | 0.106 |
| 1         | 16.1                              | E45/M48-F-070 ( <i>L. sativa</i> )   |                | AFLP             | 0.227              | 0.520           | 0.253            | 0.466              | 0.534             | -                 | 0.587 | 0.278 | 0.135 |
| 1         | 16.3                              | CO9C-CTT-013 ( <i>L. sativa</i> )    |                | SSAP             | 0.230              | -               | 0.770            | 0.472              | -                 | 0.528             | 0.572 | -     | 0.428 |
| 1         | 18                                | CO9C-ACG-008 ( <i>L. serriola</i> )  |                | SSAP             | 0.809              | -               | 0.191            | -                  | -                 | -                 | 0.933 | -     | 0.067 |
| 1         | 28                                | NBS-33 ( <i>L. sativa</i> )          |                | NBS              | 0.267              | -               | 0.733            | 0.523              | -                 | 0.477             | 0.667 | -     | 0.333 |
| 1         | 28.7                              | E45/M48-F-109 ( <i>L. sativa</i> )   |                | AFLP             | 0.289              | 0.542           | 0.169            | 0.516              | 0.484             | -                 | 0.656 | 0.262 | 0.082 |
| 1         | 29.5                              | NBS-13 ( <i>L. serriola</i> )        |                | NBS              | 0.778              | -               | 0.222            | -                  | -                 | -                 | 0.905 | -     | 0.095 |
| 1         | 33.5                              | E44/M48-F-297 ( <i>L. sativa</i> )   |                | AFLP             | 0.259              | 0.553           | 0.188            | 0.484              | 0.516             | -                 | 0.617 | 0.286 | 0.097 |
| 1         | 40.9                              | E44/M48-F-109 ( <i>L. sativa</i> )   |                | AFLP             | 0.273              | 0.511           | 0.216            | 0.516              | 0.484             | -                 | 0.648 | 0.247 | 0.104 |
| 1         | 71                                | CO9C-ATC-011 ( <i>L. sativa</i> )    |                | SSAP             | 0.360              | -               | 0.640            | 0.628              | -                 | 0.372             | 0.827 | -     | 0.173 |
| 1         | 78.8                              | E44/M48-F-114 ( <i>L. serriola</i> ) |                | AFLP             | 0.333              | 0.540           | 0.126            | 0.552              | 0.448             | -                 | 0.702 | 0.242 | 0.057 |
| 1         | 86.3                              | CO9C-ATC-005 ( <i>L. serriola</i> )  |                | SSAP             | 0.852              | -               | 0.148            | -                  | -                 | -                 | 0.963 | -     | 0.037 |
| 1         | 97.3                              | E45/M48-F-297 ( <i>L. sativa</i> )   |                | AFLP             | 0.394              | 0.408           | 0.197            | 0.659              | 0.341             | -                 | 0.793 | 0.139 | 0.067 |
| 2         | 1.9                               | E45/M48-F-235 ( <i>L. serriola</i> ) |                | AFLP             | 0.274              | 0.500           | 0.226            | 0.523              | 0.477             | -                 | 0.653 | 0.239 | 0.108 |
| 2         | 13.2                              | NBS-23 ( <i>L. serriola</i> )        |                | NBS              | 0.767              | -               | 0.233            | -                  | -                 | -                 | 0.894 | -     | 0.106 |
| 2         | 17                                | CO9C-ACT-012 ( <i>L. sativa</i> )    |                | SSAP             | 0.256              | -               | 0.744            | 0.508              | -                 | 0.492             | 0.639 | -     | 0.361 |
| 2         | 25                                | E35/M59-F-273 ( <i>L. sativa</i> )   |                | AFLP             | 0.291              | 0.442           | 0.267            | 0.568              | 0.432             | -                 | 0.694 | 0.191 | 0.115 |
| 2         | 32.4                              | NBS-30 ( <i>L. serriola</i> )        |                | NBS              | 0.709              | -               | 0.291            | -                  | -                 | -                 | 0.822 | -     | 0.178 |
| 2         | 39.6                              | E44/M48-F-147 ( <i>L. sativa</i> )   |                | AFLP             | 0.298              | 0.440           | 0.262            | 0.575              | 0.425             | -                 | 0.701 | 0.187 | 0.111 |
| 2         | 61.4                              | CO9C-ACT-004 ( <i>L. serriola</i> )  |                | SSAP             | 0.742              | -               | 0.258            | -                  | -                 | -                 | 0.865 | -     | 0.135 |
| 2         | 62.4                              | CO9C-ATC-010 ( <i>L. sativa</i> )    |                | SSAP             | 0.258              | -               | 0.742            | 0.511              | -                 | 0.489             | 0.646 | -     | 0.354 |
| 2         | 65.3                              | CO9C-CTT-008 ( <i>L. serriola</i> )  |                | SSAP             | 0.770              | -               | 0.230            | -                  | -                 | -                 | 0.897 | -     | 0.103 |
| 2         | 67.4                              | CO9C-ACG-014 ( <i>L. sativa</i> )    |                | SSAP             | 0.270              | -               | 0.730            | 0.526              | -                 | 0.474             | 0.672 | -     | 0.328 |
| 2         | 81.3                              | CO9C-GTT-216 ( <i>L. serriola</i> )  |                | SSAP             | 0.793              | -               | 0.207            | -                  | -                 | -                 | 0.920 | -     | 0.080 |
| 2         | 90.5                              | CO9C-CTG-319 ( <i>L. serriola</i> )  |                | SSAP             | 0.795              | -               | 0.205            | -                  | -                 | -                 | 0.922 | -     | 0.078 |
| 3         | 7.9                               | E44/M49-F-212 ( <i>L. sativa</i> )   |                | AFLP             | 0.205              | 0.545           | 0.250            | 0.429              | 0.571             | -                 | 0.545 | 0.312 | 0.143 |
| 3         | 8.8                               | NBS-01 ( <i>L. serriola</i> )        |                | NBS              | 0.722              | -               | 0.278            | -                  | -                 | -                 | 0.840 | -     | 0.160 |
| 3         | 11.6                              | E44/M49-F-082 ( <i>L. sativa</i> )   |                | AFLP             | 0.153              | 0.625           | 0.222            | 0.328              | 0.672             | -                 | 0.431 | 0.420 | 0.149 |
| 3         | 13.1                              | CO9C-AAT-305 ( <i>L. serriola</i> )  |                | SSAP             | 0.787              | -               | 0.213            | -                  | -                 | -                 | 0.913 | -     | 0.087 |
| 3         | 18.8                              | CO9C-CTG-328 ( <i>L. serriola</i> )  |                | SSAP             | 0.761              | -               | 0.239            | -                  | -                 | -                 | 0.888 | -     | 0.112 |
| 3         | 21.5                              | E45/M48-F-207 ( <i>L. serriola</i> ) |                | AFLP             | 0.202              | 0.494           | 0.303            | 0.450              | 0.550             | -                 | 0.561 | 0.272 | 0.167 |
| 3         | 24.2                              | CO9C-CTA-600 ( <i>L. sativa</i> )    |                | SSAP             | 0.191              | -               | 0.809            | 0.415              | -                 | 0.585             | 0.455 | -     | 0.545 |
| 3         | 26.5                              | NBS-34 ( <i>L. sativa</i> )          |                | NBS              | 0.176              | -               | 0.824            | 0.391              | -                 | 0.609             | 0.408 | -     | 0.592 |
| 3         | 27.2                              | E35/M59-F-281 ( <i>L. serriola</i> ) |                | AFLP             | 0.174              | 0.523           | 0.302            | 0.400              | 0.600             | -                 | 0.505 | 0.314 | 0.181 |
| 3         | 29.7                              | CO9C-CTA-325 ( <i>L. sativa</i> )    |                | SSAP             | 0.180              | -               | 0.820            | 0.397              | -                 | 0.603             | 0.419 | -     | 0.581 |
| 3         | 37.1                              | E44/M49-F-479 ( <i>L. sativa</i> )   |                | AFLP             | 1.000              | 0.000           | 0.000            | 0.500              | 0.500             | -                 | 0.625 | 0.250 | 0.125 |
| 3         | 44.9                              | E44/M49-F-362 ( <i>L. sativa</i> )   |                | AFLP             | 0.164              | 0.582           | 0.254            | 0.361              | 0.639             | -                 | 0.466 | 0.372 | 0.162 |
| 3         | 46.6                              | E45/M48-F-287 ( <i>L. serriola</i> ) |                | AFLP             | 0.103              | 0.540           | 0.356            | 0.277              | 0.723             | -                 | 0.352 | 0.391 | 0.258 |
| 3         | 47.1                              | NBS-18 ( <i>L. sativa</i> )          |                | NBS              | 0.161              | -               | 0.839            | 0.365              | -                 | 0.635             | 0.356 | -     | 0.644 |
| 3         | 50.8                              | CO9C-ACG-011 ( <i>L. serriola</i> )  |                | SSAP             | 0.618              | -               | 0.382            | -                  | -                 | -                 | 0.671 | -     | 0.329 |
| 3         | 52                                | NBS-20 ( <i>L. serriola</i> )        |                | NBS              | 0.659              | -               | 0.341            | -                  | -                 | -                 | 0.744 | -     | 0.256 |
| 3         | 52.2                              | 1A36-F-195 ( <i>L. sativa</i> )      |                | AFLP             | 0.083              | 0.548           | 0.369            | 0.233              | 0.767             | -                 | 0.297 | 0.420 | 0.283 |
| 3         | 52.4                              | 1A31-F-107 ( <i>L. sativa</i> )      |                | AFLP             | 0.123              | 0.543           | 0.333            | 0.313              | 0.688             | -                 | 0.397 | 0.373 | 0.229 |
| 3         | 52.5                              | E35/M59-F-299 ( <i>L. sativa</i> )   |                | AFLP             | 0.125              | 0.538           | 0.338            | 0.317              | 0.683             | -                 | 0.403 | 0.367 | 0.230 |
| 3         | 53.1                              | CO9C-CTA-142 ( <i>L. sativa</i> )    |                | SSAP             | 0.101              | -               | 0.899            | 0.252              | -                 | 0.748             | 0.160 | -     | 0.840 |
| 3         | 58.8                              | CO9C-GTT-241 ( <i>L. serriola</i> )  |                | SSAP             | 0.701              | -               | 0.299            | -                  | -                 | -                 | 0.811 | -     | 0.189 |
| 3         | 72.5                              | 1A31-F-122 ( <i>L. serriola</i> )    |                | AFLP             | 0.148              | 0.556           | 0.296            | 0.348              | 0.652             | -                 | 0.444 | 0.362 | 0.193 |
| 3         | 72.5                              | NBS-32 ( <i>L. serriola</i> )        |                | NBS              | 0.686              | -               | 0.314            | -                  | -                 | -                 | 0.788 | -     | 0.212 |
| 3         | 73.1                              | 1A31-F-124 ( <i>L. serriola</i> )    |                | AFLP             | 0.148              | 0.543           | 0.309            | 0.353              | 0.647             | -                 | 0.449 | 0.351 | 0.200 |
| 3         | 83                                | NBS-35 ( <i>L. serriola</i> )        |                | NBS              | 0.633              | -               | 0.367            | -                  | -                 | -                 | 0.698 | -     | 0.302 |
| 3         | 87.8                              | CO9C-GTG-070 ( <i>L. sativa</i> )    |                | SSAP             | 0.180              | -               | 0.820            | 0.397              | -                 | 0.603             | 0.419 | -     | 0.581 |
| 3         | 89                                | CO9C-ATA-006 ( <i>L. serriola</i> )  |                | SSAP             | 0.716              | -               | 0.284            | -                  | -                 | -                 | 0.832 | -     | 0.168 |
| 3         | 106.6                             | NBS-09 ( <i>L. sativa</i> )          |                | NBS              | 0.111              | -               | 0.889            | 0.273              | -                 | 0.727             | 0.190 | -     | 0.810 |
| 3         | 112.4                             | CO9C-CTG-380 ( <i>L. serriola</i> )  |                | SSAP             | 0.761              | -               | 0.239            | -                  | -                 | -                 | 0.888 | -     | 0.112 |
| 3         | 117.2                             | E35/M59-F-193 ( <i>L. sativa</i> )   |                | AFLP             | 0.181              | 0.614           | 0.205            | 0.370              | 0.630             | -                 | 0.484 | 0.387 | 0.129 |
| 3         | 117.2                             | E35/M59-F-187 ( <i>L. serriola</i> ) |                | AFLP             | 0.153              | 0.612           | 0.235            | 0.333              | 0.667             | -                 | 0.435 | 0.408 | 0.157 |
| 3         | 125.1                             | 1A31-F-347 ( <i>L. serriola</i> )    |                | AFLP             | 0.146              | 0.585           | 0.268            | 0.333              | 0.667             | -                 | 0.431 | 0.390 | 0.179 |
| 3         | 129.6                             | CO9C-CTA-285 ( <i>L. sativa</i> )    |                | SSAP             | 0.157              | -               | 0.843            | 0.359              | -                 | 0.641             | 0.343 | -     | 0.657 |
| 3         | 130.2                             | CO9C-TCC-181 ( <i>L. serriola</i> )  |                | SSAP             | 0.775              | -               | 0.225            | -                  | -                 | -                 | 0.903 | -     | 0.097 |
| 4         | 17.5                              | CO9C-TCC-202 ( <i>L. sativa</i> )    |                | SSAP             | 0.281              | -               | 0.719            | 0.540              | -                 | 0.460             | 0.696 | -     | 0.304 |
| 4         | 25                                | CO9C-GTT-148 ( <i>L. sativa</i> )    |                | SSAP             | 0.299              | -               | 0.701            | 0.561              | -                 | 0.439             | 0.732 | -     | 0.268 |
| 4         | 36.9                              | E35/M59-F-220 ( <i>L. sativa</i> )   |                | AFLP             | 0.250              | 0.513           | 0.238            | 0.494              | 0.506             | -                 | 0.620 | 0.259 | 0.120 |
| 4         | 49.1                              | E35/M59-F-276 ( <i>L. sativa</i> )   |                | AFLP             | 0.338              | 0.416           | 0.247            | 0.619              | 0.381             | -                 | 0.748 | 0.158 | 0.094 |
| 4         | 52.1                              | CO9C-TCC-281 ( <i>L. sativa</i> )    |                | SSAP             | 0.247              | -               | 0.753            | 0.496              | -                 | 0.504             | 0.618 | -     | 0.382 |
| 4         | 58.8                              | CO9C-ATT-009 ( <i>L. sativa</i> )    |                | SSAP             | 0.225              | -               | 0.775            | 0.465              | -                 | 0.535             | 0.558 | -     | 0.442 |

|           |                                   |                                      |             | S <sub>1</sub>     | S <sub>1</sub> | S <sub>1</sub>   | BC <sub>1</sub>    | BC <sub>1</sub> | BC <sub>1</sub>  | BC <sub>1S1</sub>  | BC <sub>1S1</sub> | BC <sub>1S1</sub> |
|-----------|-----------------------------------|--------------------------------------|-------------|--------------------|----------------|------------------|--------------------|-----------------|------------------|--------------------|-------------------|-------------------|
|           |                                   |                                      |             | <i>L. serriola</i> | Hetero-zygous  | <i>L. sativa</i> | <i>L. serriola</i> | Hetero-zygous   | <i>L. sativa</i> | <i>L. serriola</i> | Hetero-zygous     | <i>L. sativa</i>  |
| Mendelian | Co-dominant                       |                                      |             | 0.25               | 0.5            | 0.25             | 0.5                | 0.5             | -                | 0.625              | 0.25              | 0.125             |
| Mendelian | Dominant: <i>L. serriola</i> band |                                      |             | 0.75               | -              | 0.25             | -                  | -               | -                | 0.875              | -                 | 0.125             |
| Mendelian | Dominant: <i>L. sativa</i> band   |                                      |             | 0.25               | -              | 0.75             | 0.5                | -               | 0.5              | 0.625              | -                 | 0.375             |
| LG        | cMorgan                           | Loci (incl band presence state)      | Marker type |                    |                |                  |                    |                 |                  |                    |                   |                   |
| 4         | 60.8                              | CO9C-ATT-010 ( <i>L. sativa</i> )    | SSAP        | 0.225              | -              | 0.775            | 0.465              | -               | 0.535            | 0.558              | -                 | 0.442             |
| 4         | 63.4                              | CO9C-GTG-310 ( <i>L. sativa</i> )    | SSAP        | 0.213              | -              | 0.787            | 0.449              | -               | 0.551            | 0.525              | -                 | 0.475             |
| 4         | 75.8                              | E45/M48-F-071 ( <i>L. serriola</i> ) | AFLP        | 0.234              | 0.416          | 0.351            | 0.529              | 0.471           | -                | 0.639              | 0.196             | 0.165             |
| 4         | 83.4                              | CO9C-CTT-012 ( <i>L. sativa</i> )    | SSAP        | 0.253              | -              | 0.747            | 0.504              | -               | 0.496            | 0.632              | -                 | 0.368             |
| 4         | 94.1                              | CO9C-ACT-005 ( <i>L. sativa</i> )    | SSAP        | 0.180              | -              | 0.820            | 0.397              | -               | 0.603            | 0.419              | -                 | 0.581             |
| 4         | 100.5                             | CO9C-CTA-102 ( <i>L. sativa</i> )    | SSAP        | 0.124              | -              | 0.876            | 0.297              | -               | 0.703            | 0.230              | -                 | 0.770             |
| 4         | 102.9                             | CO9C-CTC-001 ( <i>L. sativa</i> )    | SSAP        | 0.124              | -              | 0.876            | 0.297              | -               | 0.703            | 0.230              | -                 | 0.770             |
| 4         | 104.7                             | CO9C-CTC-020 ( <i>L. sativa</i> )    | SSAP        | 0.102              | -              | 0.898            | 0.255              | -               | 0.745            | 0.163              | -                 | 0.837             |
| 4         | 106.7                             | CO9C-CTC-021 ( <i>L. serriola</i> )  | SSAP        | 0.591              | -              | 0.409            | -                  | -               | -                | 0.619              | -                 | 0.381             |
| 4         | 109.2                             | CO9C-TCC-167 ( <i>L. serriola</i> )  | SSAP        | 0.663              | -              | 0.337            | -                  | -               | -                | 0.751              | -                 | 0.249             |
| 4         | 112.2                             | 1A31-F-259 ( <i>L. sativa</i> )      | AFLP        | 0.092              | 0.477          | 0.431            | 0.279              | 0.721           | -                | 0.346              | 0.344             | 0.311             |
| 4         | 153.3                             | CO9C-CTC-010 ( <i>L. serriola</i> )  | SSAP        | 0.787              | -              | 0.213            | -                  | -               | -                | 0.913              | -                 | 0.087             |
| 4         | 157.8                             | 1A36-F-250 ( <i>L. sativa</i> )      | AFLP        | 0.205              | 0.580          | 0.216            | 0.414              | 0.586           | -                | 0.534              | 0.340             | 0.127             |
| 4         | 160.5                             | CO9C-GTG-193 ( <i>L. sativa</i> )    | SSAP        | 0.247              | -              | 0.753            | 0.496              | -               | 0.504            | 0.618              | -                 | 0.382             |
| 5         | 0                                 | NBS-24 ( <i>L. serriola</i> )        | NBS         | 0.802              | -              | 0.198            | -                  | -               | -                | 0.928              | -                 | 0.072             |
| 5         | 3.3                               | CO9C-CTC-017 ( <i>L. sativa</i> )    | SSAP        | 0.281              | -              | 0.719            | 0.540              | -               | 0.460            | 0.696              | -                 | 0.304             |
| 5         | 8.3                               | CO9C-ATC-006 ( <i>L. serriola</i> )  | SSAP        | 0.787              | -              | 0.213            | -                  | -               | -                | 0.913              | -                 | 0.087             |
| 5         | 13.5                              | E44/M48-F-223 ( <i>L. serriola</i> ) | AFLP        | 0.287              | 0.529          | 0.184            | 0.521              | 0.479           | -                | 0.659              | 0.253             | 0.088             |
| 5         | 18.8                              | CO9C-CTC-004 ( <i>L. serriola</i> )  | SSAP        | 0.798              | -              | 0.202            | -                  | -               | -                | 0.924              | -                 | 0.076             |
| 5         | 22.8                              | CO9C-ACG-005 ( <i>L. serriola</i> )  | SSAP        | 0.764              | -              | 0.236            | -                  | -               | -                | 0.891              | -                 | 0.109             |
| 5         | 28.4                              | CO9C-AAT-162 ( <i>L. serriola</i> )  | SSAP        | 0.764              | -              | 0.236            | -                  | -               | -                | 0.891              | -                 | 0.109             |
| 5         | 35.9                              | 1A31-F-129 ( <i>L. serriola</i> )    | AFLP        | 0.305              | 0.451          | 0.244            | 0.575              | 0.425           | -                | 0.704              | 0.192             | 0.104             |
| 5         | 43.7                              | 1A31-F-224 ( <i>L. sativa</i> )      | AFLP        | 0.309              | 0.444          | 0.247            | 0.581              | 0.419           | -                | 0.711              | 0.186             | 0.103             |
| 5         | 46                                | CO9C-ATT-014 ( <i>L. serriola</i> )  | SSAP        | 0.764              | -              | 0.236            | -                  | -               | -                | 0.891              | -                 | 0.109             |
| 5         | 66                                | CO9C-CTG-96 ( <i>L. sativa</i> )     | SSAP        | 0.261              | -              | 0.739            | 0.515              | -               | 0.485            | 0.653              | -                 | 0.347             |
| 5         | 66.6                              | CO9C-ATC-005 ( <i>L. sativa</i> )    | SSAP        | 0.236              | -              | 0.764            | 0.481              | -               | 0.519            | 0.589              | -                 | 0.411             |
| 5         | 70.8                              | CO9C-ATC-002 ( <i>L. serriola</i> )  | SSAP        | 0.730              | -              | 0.270            | -                  | -               | -                | 0.851              | -                 | 0.149             |
| 5         | 72.6                              | CO9C-ACG-013 ( <i>L. serriola</i> )  | SSAP        | 0.753              | -              | 0.247            | -                  | -               | -                | 0.878              | -                 | 0.122             |
| 5         | 75.6                              | CO9C-AAT-200 ( <i>L. sativa</i> )    | SSAP        | 0.292              | -              | 0.708            | 0.553              | -               | 0.447            | 0.719              | -                 | 0.281             |
| 5         | 78.5                              | CO9C-ACT-009 ( <i>L. sativa</i> )    | SSAP        | 0.180              | -              | 0.820            | 0.397              | -               | 0.603            | 0.419              | -                 | 0.581             |
| 5         | 84.6                              | CO9C-AAT-172 ( <i>L. sativa</i> )    | SSAP        | 0.191              | -              | 0.809            | 0.415              | -               | 0.585            | 0.455              | -                 | 0.545             |
| 5         | 86.7                              | 1A36-F-160 ( <i>L. serriola</i> )    | AFLP        | 0.224              | 0.529          | 0.247            | 0.458              | 0.542           | -                | 0.579              | 0.287             | 0.134             |
| 5         | 107.9                             | E44/M49-F-316 ( <i>L. serriola</i> ) | AFLP        | 0.114              | 0.544          | 0.342            | 0.295              | 0.705           | -                | 0.375              | 0.384             | 0.241             |
| 5         | 109.6                             | E45/M48-F-127 ( <i>L. serriola</i> ) | AFLP        | 0.156              | 0.422          | 0.422            | 0.426              | 0.574           | -                | 0.515              | 0.242             | 0.242             |
| 5         | 110.3                             | E35/M59-F-129 ( <i>L. serriola</i> ) | AFLP        | 0.193              | 0.494          | 0.313            | 0.438              | 0.562           | -                | 0.547              | 0.277             | 0.176             |
| 5         | 111                               | CO9C-GTG-111 ( <i>L. sativa</i> )    | SSAP        | 0.191              | -              | 0.809            | 0.415              | -               | 0.585            | 0.455              | -                 | 0.545             |
| 5         | 111.5                             | CO9C-GTT-213 ( <i>L. serriola</i> )  | SSAP        | 0.724              | -              | 0.276            | -                  | -               | -                | 0.843              | -                 | 0.157             |
| 5         | 112.8                             | CO9C-CTG-178 ( <i>L. sativa</i> )    | SSAP        | 0.182              | -              | 0.818            | 0.400              | -               | 0.600            | 0.426              | -                 | 0.574             |
| 5         | 117.3                             | E35/M59-F-270 ( <i>L. sativa</i> )   | AFLP        | 0.257              | 0.500          | 0.243            | 0.507              | 0.493           | -                | 0.634              | 0.246             | 0.120             |
| 5         | 120.1                             | NBS-10 ( <i>L. sativa</i> )          | NBS         | 0.195              | -              | 0.805            | 0.421              | -               | 0.579            | 0.469              | -                 | 0.531             |
| 5         | 126.2                             | E35/M59-F-178 ( <i>L. serriola</i> ) | AFLP        | 0.241              | 0.410          | 0.349            | 0.541              | 0.459           | -                | 0.651              | 0.188             | 0.161             |
| 5         | 126.5                             | E35/M59-F-182 ( <i>L. sativa</i> )   | AFLP        | 0.238              | 0.393          | 0.369            | 0.548              | 0.452           | -                | 0.656              | 0.178             | 0.167             |
| 5         | 129                               | NBS-22 ( <i>L. serriola</i> )        | NBS         | 0.598              | -              | 0.402            | -                  | -               | -                | 0.632              | -                 | 0.368             |
| 5         | 131.5                             | CO9C-AAT-431 ( <i>L. sativa</i> )    | SSAP        | 0.112              | -              | 0.888            | 0.275              | -               | 0.725            | 0.194              | -                 | 0.806             |
| 5         | 133.2                             | 1A36-F-156 ( <i>L. serriola</i> )    | AFLP        | 0.253              | 0.391          | 0.356            | 0.564              | 0.436           | -                | 0.674              | 0.170             | 0.155             |
| 5         | 134.3                             | NBS26 ( <i>L. sativa</i> )           | NBS         | 0.233              | -              | 0.767            | 0.476              | -               | 0.524            | 0.579              | -                 | 0.421             |
| 5         | 140.2                             | CO9C-AAT-340 ( <i>L. serriola</i> )  | SSAP        | 0.742              | -              | 0.258            | -                  | -               | -                | 0.865              | -                 | 0.135             |
| 5         | 163.9                             | E35/M59-F-198 ( <i>L. sativa</i> )   | AFLP        | 0.244              | 0.512          | 0.244            | 0.488              | 0.512           | -                | 0.613              | 0.262             | 0.125             |
| 6         | 7.1                               | NBS-07 ( <i>L. serriola</i> )        | NBS         | 0.742              | -              | 0.258            | -                  | -               | -                | 0.865              | -                 | 0.135             |
| 6         | 7.8                               | 1A36-F-304 ( <i>L. sativa</i> )      | AFLP        | 0.233              | 0.523          | 0.244            | 0.471              | 0.529           | -                | 0.594              | 0.277             | 0.129             |
| 6         | 11.7                              | CO9C-ATT-013 ( <i>L. sativa</i> )    | SSAP        | 0.180              | -              | 0.820            | 0.397              | -               | 0.603            | 0.419              | -                 | 0.581             |
| 6         | 40                                | CO9C-ACG-004 ( <i>L. serriola</i> )  | SSAP        | 0.697              | -              | 0.303            | -                  | -               | -                | 0.804              | -                 | 0.196             |
| 6         | 43.4                              | CO9C-AAG-005 ( <i>L. serriola</i> )  | SSAP        | 0.750              | -              | 0.250            | -                  | -               | -                | 0.875              | -                 | 0.125             |
| 6         | 45.1                              | E35/M59-F-217 ( <i>L. sativa</i> )   | AFLP        | 0.269              | 0.507          | 0.224            | 0.514              | 0.486           | -                | 0.645              | 0.246             | 0.109             |
| 6         | 45.7                              | CO9C-ATT-005 ( <i>L. sativa</i> )    | SSAP        | 0.202              | -              | 0.798            | 0.432              | -               | 0.568            | 0.491              | -                 | 0.509             |
| 6         | 53.7                              | CO9C-ACG-012 ( <i>L. sativa</i> )    | SSAP        | 0.281              | -              | 0.719            | 0.540              | -               | 0.460            | 0.696              | -                 | 0.304             |
| 6         | 55.6                              | CO9C-AAG-008 ( <i>L. sativa</i> )    | SSAP        | 0.276              | -              | 0.724            | 0.533              | -               | 0.467            | 0.685              | -                 | 0.315             |
| 6         | 56.6                              | CO9C-CTT-006 ( <i>L. sativa</i> )    | SSAP        | 0.299              | -              | 0.701            | 0.561              | -               | 0.439            | 0.732              | -                 | 0.268             |
| 6         | 71.6                              | E35/M59-F-103 ( <i>L. sativa</i> )   | AFLP        | 0.346              | 0.457          | 0.198            | 0.602              | 0.398           | -                | 0.740              | 0.182             | 0.079             |
| 6         | 82.8                              | CO9C-CTC-008 ( <i>L. sativa</i> )    | SSAP        | 0.295              | -              | 0.705            | 0.557              | -               | 0.443            | 0.725              | -                 | 0.275             |
| 6         | 82.9                              | CO9C-CTA-253 ( <i>L. serriola</i> )  | SSAP        | 0.764              | -              | 0.236            | -                  | -               | -                | 0.891              | -                 | 0.109             |
| 7         | 3.8                               | CO9C-GTT-155 ( <i>L. serriola</i> )  | SSAP        | 0.782              | -              | 0.218            | -                  | -               | -                | 0.909              | -                 | 0.091             |
| 7         | 4.3                               | CO9C-CTA-406 ( <i>L. serriola</i> )  | SSAP        | 0.798              | -              | 0.202            | -                  | -               | -                | 0.924              | -                 | 0.076             |
| 7         | 6.3                               | CO9C-ATA-004 ( <i>L. sativa</i> )    | SSAP        | 0.216              | -              | 0.784            | 0.452              | -               | 0.548            | 0.532              | -                 | 0.468             |
| 7         | 14.2                              | E44/M49-F-248 ( <i>L. sativa</i> )   | AFLP        | 0.264              | 0.517          | 0.218            | 0.505              | 0.495           | -                | 0.636              | 0.256             | 0.108             |
| 7         | 15.3                              | 1A36-F-171 ( <i>L. sativa</i> )      | AFLP        | 0.250              | 0.511          | 0.239            | 0.494              | 0.506           | -                | 0.621              | 0.259             | 0.121             |
| 7         | 15.6                              | CO9C-ACG-002 ( <i>L. serriola</i> )  | SSAP        | 0.761              | -              | 0.239            | -                  | -               | -                | 0.888              | -                 | 0.112             |
| 7         | 15.9                              | E45/M48-F-142 ( <i>L. sativa</i> )   | AFLP        | 0.259              | 0.506          | 0.235            | 0.506              | 0.494           | -                | 0.634              | 0.250             | 0.116             |
| 7         | 17.7                              | CO9C-ACT-010 ( <i>L. serriola</i> )  | SSAP        | 0.787              | -              | 0.213            | -                  | -               | -                | 0.913              | -                 | 0.087             |
| 7         | 25.6                              | CO9C-AAT-098 ( <i>L. sativa</i> )    | SSAP        | 0.236              | -              | 0.764            | 0.481              | -               | 0.519            | 0.589              | -                 | 0.411             |
| 7         | 30.9                              | CO9C-AAG-007 ( <i>L. sativa</i> )    | SSAP        | 0.213              | -              | 0.787            | 0.449              | -               | 0.551            | 0.525              | -                 | 0.475             |

|           |                                   | S <sub>1</sub>                       | S <sub>1</sub> | S <sub>1</sub>   | BC <sub>1</sub>    | BC <sub>1</sub> | BC <sub>1</sub>  | BC <sub>1S1</sub>  | BC <sub>1S1</sub> | BC <sub>1S1</sub> |       |
|-----------|-----------------------------------|--------------------------------------|----------------|------------------|--------------------|-----------------|------------------|--------------------|-------------------|-------------------|-------|
|           |                                   | <i>L. serriola</i>                   | Hetero-zygous  | <i>L. sativa</i> | <i>L. serriola</i> | Hetero-zygous   | <i>L. sativa</i> | <i>L. serriola</i> | Hetero-zygous     | <i>L. sativa</i>  |       |
| Mendelian | Co-dominant                       | 0.25                                 | 0.5            | 0.25             | 0.5                | 0.5             | -                | 0.625              | 0.25              | 0.125             |       |
| Mendelian | Dominant: <i>L. serriola</i> band | 0.75                                 | -              | 0.25             | -                  | -               | -                | 0.875              | -                 | 0.125             |       |
| Mendelian | Dominant: <i>L. sativa</i> band   | 0.25                                 | -              | 0.75             | 0.5                | -               | 0.5              | 0.625              | -                 | 0.375             |       |
| LG        | cMorgan                           | Loci (incl band presence state)      | Marker type    |                  |                    |                 |                  |                    |                   |                   |       |
| 7         | 40.4                              | CO9C-ACT-013 ( <i>L. serriola</i> )  | SSAP           | 0.775            | -                  | 0.225           | -                | -                  | 0.903             | -                 | 0.097 |
| 7         | 42.1                              | NBS-04 ( <i>L. sativa</i> )          | NBS            | 0.256            | -                  | 0.744           | 0.507            | 0.493              | 0.639             | -                 | 0.361 |
| 7         | 43.5                              | NBS-16 ( <i>L. sativa</i> )          | NBS            | 0.244            | -                  | 0.756           | 0.493            | -                  | 0.507             | -                 | 0.389 |
| 7         | 50.6                              | CO9C-CTG-112 ( <i>L. serriola</i> )  | SSAP           | 0.761            | -                  | 0.239           | -                | -                  | 0.888             | -                 | 0.112 |
| 7         | 60.5                              | CO9C-ACT-006 ( <i>L. serriola</i> )  | SSAP           | 0.809            | -                  | 0.191           | -                | -                  | 0.933             | -                 | 0.067 |
| 7         | 61.6                              | 1A31-F-170 ( <i>L. serriola</i> )    | AFLP           | 0.173            | 0.593              | 0.235           | 0.368            | 0.632              | -                 | 0.478             | 0.374 |
| 7         | 63.2                              | E35/M59-F-101 ( <i>L. serriola</i> ) | AFLP           | 0.120            | 0.560              | 0.320           | 0.300            | 0.700              | -                 | 0.384             | 0.392 |
| 7         | 66.8                              | CO9C-CTT-002 ( <i>L. serriola</i> )  | SSAP           | 0.770            | -                  | 0.230           | -                | -                  | 0.897             | -                 | 0.103 |
| 7         | 68.6                              | CO9C-ACT-001 ( <i>L. serriola</i> )  | SSAP           | 0.747            | -                  | 0.253           | -                | -                  | 0.872             | -                 | 0.128 |
| 7         | 90.7                              | 1A36-F-223 ( <i>L. sativa</i> )      | AFLP           | 0.212            | 0.565              | 0.224           | 0.429            | 0.571              | -                 | 0.550             | 0.323 |
| 7         | 97                                | CO9C-ATA-009 ( <i>L. serriola</i> )  | SSAP           | 0.779            | -                  | 0.221           | -                | -                  | 0.906             | -                 | 0.094 |
| 8         | 0                                 | CO9C-GTT-270 ( <i>L. sativa</i> )    | SSAP           | 0.267            | -                  | 0.733           | 0.522            | -                  | 0.478             | 0.665             | -     |
| 8         | 0.5                               | CO9C-CTC-014 ( <i>L. serriola</i> )  | SSAP           | 0.818            | -                  | 0.182           | -                | -                  | 0.940             | -                 | 0.060 |
| 8         | 5.1                               | NBS-11 ( <i>L. serriola</i> )        | NBS            | 0.778            | -                  | 0.222           | -                | -                  | 0.905             | -                 | 0.095 |
| 8         | 9.5                               | E45/M48-F-067 ( <i>L. serriola</i> ) | AFLP           | 0.222            | 0.472              | 0.306           | 0.485            | 0.515              | -                 | 0.599             | 0.243 |
| 8         | 18.4                              | E44/M49-F-262 ( <i>L. sativa</i> )   | AFLP           | 0.284            | 0.477              | 0.239           | 0.543            | 0.457              | -                 | 0.673             | 0.218 |
| 8         | 25.6                              | NBS-08 ( <i>L. serriola</i> )        | NBS            | 0.782            | -                  | 0.218           | -                | -                  | 0.909             | -                 | 0.091 |
| 8         | 31.5                              | CO9C-CTC-005 ( <i>L. sativa</i> )    | SSAP           | 0.281            | -                  | 0.719           | 0.540            | -                  | 0.460             | 0.696             | -     |
| 8         | 57.4                              | CO9C-ATC-009 ( <i>L. serriola</i> )  | SSAP           | 0.818            | -                  | 0.182           | -                | -                  | 0.940             | -                 | 0.060 |
| 8         | 57.9                              | E35/M59-F-153 ( <i>L. sativa</i> )   | AFLP           | 0.299            | 0.529              | 0.172           | 0.531            | 0.469              | -                 | 0.671             | 0.248 |
| 8         | 60.8                              | 1A36-F-127 ( <i>L. sativa</i> )      | AFLP           | 0.282            | 0.600              | 0.118           | 0.485            | 0.515              | -                 | 0.630             | 0.309 |
| 8         | 64.2                              | CO9C-CTG-370 ( <i>L. sativa</i> )    | SSAP           | 0.227            | -                  | 0.773           | 0.469            | -                  | 0.531             | 0.565             | -     |
| 8         | 72.1                              | 1A31-F-146 ( <i>L. serriola</i> )    | AFLP           | 0.284            | 0.543              | 0.173           | 0.511            | 0.489              | -                 | 0.650             | 0.266 |
| 8         | 79.3                              | CO9C-ATT-004 ( <i>L. serriola</i> )  | SSAP           | 0.843            | -                  | 0.157           | -                | -                  | 0.957             | -                 | 0.043 |
| 8         | 80.6                              | E44/M48-F-141 ( <i>L. sativa</i> )   | AFLP           | 0.259            | 0.588              | 0.153           | 0.468            | 0.532              | -                 | 0.606             | 0.313 |
| 8         | 90.2                              | CO9C-CTC-012 ( <i>L. sativa</i> )    | SSAP           | 0.261            | -                  | 0.739           | 0.515            | -                  | 0.485             | 0.653             | -     |
| 8         | 128.2                             | 1A36-F-323 ( <i>L. sativa</i> )      | AFLP           | 0.278            | 0.544              | 0.177           | 0.506            | 0.494              | -                 | 0.643             | 0.269 |
| 8         | 133.6                             | CO9C-AAT-248 ( <i>L. sativa</i> )    | SSAP           | 0.236            | -                  | 0.764           | 0.481            | -                  | 0.519             | 0.589             | -     |
| 8         | 143.3                             | E44/M48-F-192 ( <i>L. sativa</i> )   | AFLP           | 0.213            | 0.562              | 0.225           | 0.432            | 0.568              | -                 | 0.553             | 0.319 |
| 9         | 0                                 | NBS-02 ( <i>L. serriola</i> )        | NBS            | 0.839            | -                  | 0.161           | -                | -                  | 0.955             | -                 | 0.045 |
| 9         | 20.3                              | CO9C-GTG-151 ( <i>L. serriola</i> )  | SSAP           | 0.719            | -                  | 0.281           | -                | -                  | 0.836             | -                 | 0.164 |
| 9         | 24.4                              | CO9C-AAG-003 ( <i>L. sativa</i> )    | SSAP           | 0.302            | -                  | 0.698           | 0.565            | -                  | 0.435             | 0.738             | -     |
| 9         | 28.1                              | CO9C-ATT-015 ( <i>L. sativa</i> )    | SSAP           | 0.281            | -                  | 0.719           | 0.540            | -                  | 0.460             | 0.696             | -     |
| 9         | 36.5                              | CO9C-ATC-008 ( <i>L. sativa</i> )    | SSAP           | 0.270            | -                  | 0.730           | 0.526            | -                  | 0.474             | 0.672             | -     |
| 9         | 46.4                              | 1A36-F-189 ( <i>L. sativa</i> )      | AFLP           | 0.301            | 0.494              | 0.205           | 0.549            | 0.451              | -                 | 0.685             | 0.223 |
| 9         | 49.5                              | CO9C-CTC-002 ( <i>L. sativa</i> )    | SSAP           | 0.330            | -                  | 0.670           | 0.596            | -                  | 0.404             | 0.784             | -     |
| 9         | 53.1                              | CO9C-ATC-001 ( <i>L. sativa</i> )    | SSAP           | 0.311            | -                  | 0.689           | 0.575            | -                  | 0.425             | 0.754             | -     |
| 9         | 60.7                              | E44/M49-F-175 ( <i>L. serriola</i> ) | AFLP           | 0.253            | 0.517              | 0.230           | 0.494            | 0.506              | -                 | 0.622             | 0.262 |
| 9         | 81.4                              | CO9C-CTA-098 ( <i>L. serriola</i> )  | SSAP           | 0.730            | -                  | 0.270           | -                | -                  | 0.851             | -                 | 0.149 |
| 9         | 92.6                              | CO9C-CTT-007 ( <i>L. sativa</i> )    | SSAP           | 0.172            | -                  | 0.828           | 0.385            | -                  | 0.615             | 0.394             | -     |
| 9         | 95.6                              | 1A31-F-176 ( <i>L. serriola</i> )    | AFLP           | 0.156            | 0.558              | 0.286           | 0.358            | 0.642              | -                 | 0.458             | 0.358 |
| 9         | 100.2                             | NBS-19 ( <i>L. sativa</i> )          | NBS            | 0.235            | -                  | 0.765           | 0.480            | -                  | 0.520             | 0.587             | -     |
| 9         | 102.5                             | NBS-25 ( <i>L. serriola</i> )        | NBS            | 0.744            | -                  | 0.256           | -                | -                  | 0.868             | -                 | 0.132 |
| 9         | 106.1                             | CO9C-TCC-123 ( <i>L. serriola</i> )  | SSAP           | 0.865            | -                  | 0.135           | -                | -                  | 0.970             | -                 | 0.030 |
| 9         | 108.1                             | E35/M59-F-183 ( <i>L. sativa</i> )   | AFLP           | 0.222            | 0.611              | 0.167           | 0.421            | 0.579              | -                 | 0.550             | 0.354 |
| 9         | 113.1                             | E35/M59-F-096 ( <i>L. sativa</i> )   | AFLP           | 0.232            | 0.512              | 0.256           | 0.475            | 0.525              | -                 | 0.597             | 0.269 |
| 9         | 122.5                             | CO9C-ATA-007 ( <i>L. sativa</i> )    | SSAP           | 0.205            | -                  | 0.795           | 0.435            | -                  | 0.565             | 0.498             | -     |
| 9         | 127.7                             | CO9C-AAG-004 ( <i>L. serriola</i> )  | SSAP           | 0.747            | -                  | 0.253           | -                | -                  | 0.872             | -                 | 0.128 |
| 9         | 133.4                             | CO9C-ACT-007 ( <i>L. sativa</i> )    | SSAP           | 0.191            | -                  | 0.809           | 0.415            | -                  | 0.585             | 0.455             | -     |
| 9         | 137                               | CO9C-ACT-002 ( <i>L. serriola</i> )  | SSAP           | 0.697            | -                  | 0.303           | -                | -                  | 0.804             | -                 | 0.196 |
| u         | u                                 | CO9C-ATT-011 ( <i>L. sativa</i> )    | SSAP           | 0.213            | -                  | 0.787           | 0.449            | -                  | 0.551             | 0.525             | -     |
| u         | u                                 | E44/M48-F-212 ( <i>L. serriola</i> ) | AFLP           | 0.218            | 0.460              | 0.322           | 0.487            | 0.513              | -                 | 0.599             | 0.236 |
| u         | u                                 | 1A31-F-074 ( <i>L. sativa</i> )      | AFLP           | 0.232            | 0.451              | 0.317           | 0.507            | 0.493              | -                 | 0.621             | 0.223 |
| u         | u                                 | 1A31-F-244 ( <i>L. sativa</i> )      | AFLP           | 0.263            | 0.553              | 0.184           | 0.488            | 0.512              | -                 | 0.623             | 0.283 |
| u         | u                                 | 1A31-F-323 ( <i>L. sativa</i> )      | AFLP           | 0.250            | 0.500              | 0.250           | 0.500            | 0.500              | -                 | 0.625             | 0.250 |
| u         | u                                 | 1A31-F-402 ( <i>L. sativa</i> )      | AFLP           | 0.250            | 0.500              | 0.250           | 0.500            | 0.500              | -                 | 0.625             | 0.250 |
| u         | u                                 | 1A36-F-148 ( <i>L. sativa</i> )      | AFLP           | 0.250            | 0.500              | 0.250           | 0.500            | 0.500              | -                 | 0.625             | 0.250 |
| u         | u                                 | 1A36-F-246 ( <i>L. sativa</i> )      | AFLP           | 0.365            | 0.376              | 0.259           | 0.660            | 0.340              | -                 | 0.784             | 0.128 |
| u         | u                                 | 1A36-F-299 ( <i>L. sativa</i> )      | AFLP           | 0.250            | 0.500              | 0.250           | 0.500            | 0.500              | -                 | 0.625             | 0.250 |
| u         | u                                 | 1A36-Fb-126.70 ( <i>L. sativa</i> )  | AFLP           | 0.250            | 0.500              | 0.250           | 0.500            | 0.500              | -                 | 0.625             | 0.250 |
| u         | u                                 | E35/M59-F-086 ( <i>L. sativa</i> )   | AFLP           | 0.250            | 0.500              | 0.250           | 0.500            | 0.500              | -                 | 0.625             | 0.250 |
| u         | u                                 | E35/M59-F-204 ( <i>L. sativa</i> )   | AFLP           | 0.250            | 0.500              | 0.250           | 0.500            | 0.500              | -                 | 0.625             | 0.250 |
| u         | u                                 | E35/M59-F-212 ( <i>L. sativa</i> )   | AFLP           | 0.200            | 0.541              | 0.259           | 0.425            | 0.575              | -                 | 0.540             | 0.311 |
| u         | u                                 | E44/M48-F-328 ( <i>L. sativa</i> )   | AFLP           | 0.195            | 0.552              | 0.253           | 0.415            | 0.585              | -                 | 0.529             | 0.323 |
| u         | u                                 | E44/M48-F-403 ( <i>L. sativa</i> )   | AFLP           | 0.250            | 0.500              | 0.250           | 0.500            | 0.500              | -                 | 0.625             | 0.250 |
| u         | u                                 | E44/M49-F-231 ( <i>L. sativa</i> )   | AFLP           | 0.250            | 0.500              | 0.250           | 0.500            | 0.500              | -                 | 0.625             | 0.250 |
| u         | u                                 | E44/M49-F-250 ( <i>L. sativa</i> )   | AFLP           | 0.250            | 0.500              | 0.250           | 0.500            | 0.500              | -                 | 0.625             | 0.250 |
| u         | u                                 | E44/M49-F-337 ( <i>L. sativa</i> )   | AFLP           | 0.241            | 0.542              | 0.217           | 0.471            | 0.529              | -                 | 0.598             | 0.287 |
| u         | u                                 | E45/M48-F-084 ( <i>L. sativa</i> )   | AFLP           | 0.250            | 0.500              | 0.250           | 0.250            | 0.750              | -                 | 0.625             | 0.250 |
| u         | u                                 | E45/M48-F-103 ( <i>L. sativa</i> )   | AFLP           | 0.243            | 0.554              | 0.203           | 0.468            | 0.532              | -                 | 0.597             | 0.295 |
| u         | u                                 | E45/M48-F-140 ( <i>L. sativa</i> )   | AFLP           | 0.262            | 0.500              | 0.238           | 0.512            | 0.488              | -                 | 0.640             | 0.244 |

|           |                                   | S <sub>1</sub>                       | S <sub>1</sub> | S <sub>1</sub>   | BC <sub>1</sub>    | BC <sub>1</sub> | BC <sub>1</sub>  | BC <sub>1S1</sub>  | BC <sub>1S1</sub> | BC <sub>1S1</sub> |       |       |
|-----------|-----------------------------------|--------------------------------------|----------------|------------------|--------------------|-----------------|------------------|--------------------|-------------------|-------------------|-------|-------|
|           |                                   | <i>L. serriola</i>                   | Hetero-zygous  | <i>L. sativa</i> | <i>L. serriola</i> | Hetero-zygous   | <i>L. sativa</i> | <i>L. serriola</i> | Hetero-zygous     | <i>L. sativa</i>  |       |       |
| Mendelian | Co-dominant                       | 0.25                                 | 0.5            | 0.25             | 0.5                | 0.5             | -                | 0.625              | 0.25              | 0.125             |       |       |
| Mendelian | Dominant: <i>L. serriola</i> band | 0.75                                 | -              | 0.25             | -                  | -               | -                | 0.875              | -                 | 0.125             |       |       |
| Mendelian | Dominant: <i>L. sativa</i> band   | 0.25                                 | -              | 0.75             | 0.5                | -               | 0.5              | 0.625              | -                 | 0.375             |       |       |
| LG        | cMorgan                           | Loci (incl band presence state)      | Marker type    |                  |                    |                 |                  |                    |                   |                   |       |       |
| u         | u                                 | E45/M48-F-146 ( <i>L. sativa</i> )   | AFLP           | 0.250            | 0.500              | 0.250           | 0.500            | 0.500              | -                 | 0.625             | 0.250 | 0.125 |
| u         | u                                 | E45/M48-F-159 ( <i>L. sativa</i> )   | AFLP           | 0.250            | 0.500              | 0.250           | 0.500            | 0.500              | -                 | 0.625             | 0.250 | 0.125 |
| u         | u                                 | 1A36-F-434 ( <i>L. serriola</i> )    | AFLP           | 0.250            | 0.500              | 0.250           | 0.500            | 0.500              | -                 | 0.625             | 0.250 | 0.125 |
| u         | u                                 | E44/M49-F-150 ( <i>L. serriola</i> ) | AFLP           | 0.250            | 0.500              | 0.250           | 0.500            | 0.500              | -                 | 0.625             | 0.250 | 0.125 |
| u         | u                                 | E44/M49-F-447 ( <i>L. serriola</i> ) | AFLP           | 0.250            | 0.500              | 0.250           | 0.500            | 0.500              | -                 | 0.625             | 0.250 | 0.125 |
| u         | u                                 | NBS-03 ( <i>L. sativa</i> )          | NBS            | 0.213            | -                  | 0.787           | 0.449            | -                  | 0.551             | 0.525             | -     | 0.475 |
| u         | u                                 | NBS-05 ( <i>L. sativa</i> )          | NBS            | 0.232            | -                  | 0.768           | 0.475            | -                  | 0.525             | 0.577             | -     | 0.423 |
| u         | u                                 | NBS-27 ( <i>L. sativa</i> )          | NBS            | 0.345            | -                  | 0.655           | 0.613            | -                  | 0.387             | 0.807             | -     | 0.193 |
| u         | u                                 | NBS-36 ( <i>L. sativa</i> )          | NBS            | 0.579            | -                  | 0.421           | 0.805            | -                  | 0.195             | 0.966             | -     | 0.034 |
| u         | u                                 | NBS37 ( <i>L. sativa</i> )           | NBS            | 0.632            | -                  | 0.368           | 0.837            | -                  | 0.163             | 0.978             | -     | 0.022 |
| u         | u                                 | CO9C-AAT-097 ( <i>L. sativa</i> )    | SSAP           | 0.135            | -                  | 0.865           | 0.319            | -                  | 0.681             | 0.267             | -     | 0.733 |
| u         | u                                 | CO9C-AAT-153 ( <i>L. sativa</i> )    | SSAP           | 0.270            | -                  | 0.730           | 0.526            | -                  | 0.474             | 0.672             | -     | 0.328 |
| u         | u                                 | CO9C-AAT-180 ( <i>L. sativa</i> )    | SSAP           | 0.146            | -                  | 0.854           | 0.339            | -                  | 0.661             | 0.305             | -     | 0.695 |
| u         | u                                 | CO9C-AAT-208 ( <i>L. sativa</i> )    | SSAP           | 0.067            | -                  | 0.933           | 0.178            | -                  | 0.822             | 0.073             | -     | 0.927 |
| u         | u                                 | CO9C-ATA-003 ( <i>L. sativa</i> )    | SSAP           | 0.261            | -                  | 0.739           | 0.515            | -                  | 0.485             | 0.653             | -     | 0.347 |
| u         | u                                 | CO9C-ATT-001 ( <i>L. sativa</i> )    | SSAP           | 0.303            | -                  | 0.697           | 0.566            | -                  | 0.434             | 0.740             | -     | 0.260 |
| u         | u                                 | CO9C-CTT-003 ( <i>L. sativa</i> )    | SSAP           | 0.230            | -                  | 0.770           | 0.472            | -                  | 0.528             | 0.572             | -     | 0.428 |
| u         | u                                 | CO9C-CTT-009 ( <i>L. sativa</i> )    | SSAP           | 0.253            | -                  | 0.747           | 0.504            | -                  | 0.496             | 0.632             | -     | 0.368 |
| u         | u                                 | CO9C-GTG-700 ( <i>L. sativa</i> )    | SSAP           | 0.205            | -                  | 0.795           | 0.435            | -                  | 0.565             | 0.498             | -     | 0.502 |
| u         | u                                 | CO9C-GTT-238 ( <i>L. sativa</i> )    | SSAP           | 0.218            | -                  | 0.782           | 0.456            | -                  | 0.544             | 0.539             | -     | 0.461 |
| u         | u                                 | CO9-C-GTT-440 ( <i>L. sativa</i> )   | SSAP           | 0.250            | -                  | 0.750           | 0.500            | -                  | 0.500             | 0.625             | -     | 0.375 |
| u         | u                                 | CO9C-TCC-088 ( <i>L. sativa</i> )    | SSAP           | 0.202            | -                  | 0.798           | 0.432            | -                  | 0.568             | 0.491             | -     | 0.509 |
| u         | u                                 | CO9C-TCC-146 ( <i>L. sativa</i> )    | SSAP           | 0.250            | -                  | 0.750           | 0.500            | -                  | 0.500             | 0.625             | -     | 0.375 |
| u         | u                                 | CO9C-TCC-199 ( <i>L. sativa</i> )    | SSAP           | 0.225            | -                  | 0.775           | 0.465            | -                  | 0.535             | 0.558             | -     | 0.442 |
| u         | u                                 | CO9-C-TCC-640 ( <i>L. sativa</i> )   | SSAP           | 0.250            | -                  | 0.750           | 0.500            | -                  | 0.500             | 0.625             | -     | 0.375 |
