# Supplementary material
Source: PubMed Central journal article supplement (PMC3352534)
Supplement: eva0004-0648-SD5.pdf [file eva0004-0648-SD5.pdf]

**Table S3. Confidence intervals for distortion.** Calculations are based on a Monte Carlo algorithm: the 50,000x drawing of N virtual plants from the expected distribution per locus (Table S2). Drawings were independent per locus. The below reported values correspond to the 1/# loci confidence interval for significance, the is a set value (below) in the ranked bootstrap array. Mendelian segregation is provided for comparison only.

|                                             |                                   | S <sub>1</sub>                  | S <sub>1</sub> | S <sub>1</sub> | BC <sub>1</sub> | BC <sub>1</sub> | BC <sub>1</sub> | BC <sub>1s1</sub> | BC <sub>1s1</sub> | BC <sub>1s1</sub> |       |       |
|---------------------------------------------|-----------------------------------|---------------------------------|----------------|----------------|-----------------|-----------------|-----------------|-------------------|-------------------|-------------------|-------|-------|
|                                             |                                   | L. serriola                     | Hetero-zygous  | L. sativa      | L. serriola     | Hetero-zygous   | L. sativa       | L. serriola       | Hetero-zygous     | L. sativa         |       |       |
| Mendelian                                   | Co-dominant                       | 0.25                            | 0.5            | 0.25           | 0.5             | 0.5             | -               | 0.625             | 0.25              | 0.125             |       |       |
| Mendelian                                   | Dominant: <i>L. serriola</i> band | 0.75                            | -              | 0.25           | -               | -               | -               | 0.875             | -                 | 0.125             |       |       |
| Mendelian                                   | Dominant: <i>L. sativa</i> band   | 0.25                            | -              | 0.75           | 0.5             | -               | 0.5             | 0.625             | -                 | 0.375             |       |       |
| Number of valid loci per generation         |                                   | 220                             |                |                | 158             |                 |                 | 211               |                   |                   |       |       |
| Number of valid plants tested (N)           |                                   | 92                              |                |                | 91              |                 |                 | 90                |                   |                   |       |       |
| Resulting alpha (1/ #loci per generation) = |                                   | 0.0045                          |                |                | 0.0063          |                 |                 | 0.0047            |                   |                   |       |       |
| # value in ranked 50,000 bootstrap array    |                                   | 49773                           |                |                | 49684           |                 |                 | 49764             |                   |                   |       |       |
| LG                                          | cMorgan                           | Loci (incl band presence state) |                | Marker type    |                 |                 |                 |                   |                   |                   |       |       |
| 1                                           | 4.1                               | E35/M59-F-127 (L. serriola)     | AFLP           | 0.391          | 0.663           | 0.337           | 0.637           | 0.637             | -                 | 0.758             | 0.385 | 0.198 |
| 1                                           | 16.1                              | E45/M48-F-070 (L. sativa)       | AFLP           | 0.348          | 0.652           | 0.380           | 0.604           | 0.670             | -                 | 0.725             | 0.407 | 0.242 |
| 1                                           | 16.3                              | C09C-CTT-013 (L. sativa)        | SSAP           | 0.359          | -               | 0.880           | 0.615           | -                 | 0.659             | 0.703             | -     | 0.560 |
| 1                                           | 18                                | C09C-ACG-008 (L. serriola)      | SSAP           | 0.913          | -               | 0.304           | -               | -                 | -                 | 0.989             | -     | 0.143 |
| 1                                           | 28                                | NBS-33 (L. sativa)              | NBS            | 0.402          | -               | 0.848           | 0.659           | -                 | 0.615             | 0.791             | -     | 0.462 |
| 1                                           | 28.7                              | E45/M48-F-295 (L. sativa)       | AFLP           | 0.424          | 0.674           | 0.283           | 0.648           | 0.626             | -                 | 0.780             | 0.396 | 0.165 |
| 1                                           | 29.5                              | NBS-13 (L. serriola)            | NBS            | 0.880          | -               | 0.348           | -               | -                 | -                 | 0.978             | -     | 0.187 |
| 1                                           | 33.5                              | E44/M48-F-297 (L. sativa)       | AFLP           | 0.391          | 0.685           | 0.304           | 0.615           | 0.648             | -                 | 0.747             | 0.418 | 0.187 |
| 1                                           | 40.9                              | E44/M48-F-109 (L. sativa)       | AFLP           | 0.402          | 0.652           | 0.337           | 0.648           | 0.626             | -                 | 0.780             | 0.374 | 0.198 |
| 1                                           | 71                                | C09C-ATC-011 (L. sativa)        | SSAP           | 0.500          | -               | 0.761           | 0.758           | -                 | 0.505             | 0.923             | -     | 0.286 |
| 1                                           | 78.8                              | E44/M48-F-114 (L. serriola)     | AFLP           | 0.467          | 0.674           | 0.228           | 0.681           | 0.582             | -                 | 0.824             | 0.363 | 0.132 |
| 1                                           | 86.3                              | C09C-ATA-005 (L. serriola)      | SSAP           | 0.946          | -               | 0.250           | -               | -                 | -                 | 1.000             | -     | 0.099 |
| 1                                           | 97.3                              | E45/M48-F-297 (L. sativa)       | AFLP           | 0.533          | 0.543           | 0.315           | 0.791           | 0.473             | -                 | 0.901             | 0.242 | 0.143 |
| 2                                           | 1.9                               | E45/M48-F-235 (L. serriola)     | AFLP           | 0.402          | 0.641           | 0.348           | 0.659           | 0.615             | -                 | 0.780             | 0.363 | 0.198 |
| 2                                           | 13.2                              | NBS-23 (L. serriola)            | NBS            | 0.880          | -               | 0.359           | -               | -                 | -                 | 0.967             | -     | 0.198 |
| 2                                           | 17                                | C09C-ACT-012 (L. sativa)        | SSAP           | 0.380          | -               | 0.859           | 0.648           | -                 | 0.626             | 0.769             | -     | 0.495 |
| 2                                           | 25                                | E35/M59-F-273 (L. sativa)       | AFLP           | 0.424          | 0.576           | 0.391           | 0.703           | 0.571             | -                 | 0.813             | 0.308 | 0.209 |
| 2                                           | 32.4                              | NBS-30 (L. serriola)            | NBS            | 0.826          | -               | 0.424           | -               | -                 | -                 | 0.923             | -     | 0.286 |
| 2                                           | 39.6                              | E44/M48-F-147 (L. sativa)       | AFLP           | 0.435          | 0.576           | 0.391           | 0.714           | 0.560             | -                 | 0.824             | 0.297 | 0.209 |
| 2                                           | 61.4                              | C09C-ACT-004 (L. serriola)      | SSAP           | 0.859          | -               | 0.380           | -               | -                 | -                 | 0.956             | -     | 0.231 |
| 2                                           | 62.4                              | C09C-ATC-010 (L. sativa)        | SSAP           | 0.391          | -               | 0.859           | 0.648           | -                 | 0.626             | 0.769             | -     | 0.484 |
| 2                                           | 65.3                              | C09C-CTT-008 (L. serriola)      | SSAP           | 0.880          | -               | 0.348           | -               | -                 | -                 | 0.967             | -     | 0.198 |
| 2                                           | 67.4                              | C09C-ACG-014 (L. sativa)        | SSAP           | 0.402          | -               | 0.848           | 0.659           | -                 | 0.615             | 0.802             | -     | 0.462 |
| 2                                           | 81.3                              | C09C-GTT-216 (L. serriola)      | SSAP           | 0.902          | -               | 0.326           | -               | -                 | -                 | 0.989             | -     | 0.165 |
| 2                                           | 90.5                              | C09C-CTG-319 (L. serriola)      | SSAP           | 0.902          | -               | 0.326           | -               | -                 | -                 | 0.989             | -     | 0.165 |
| 3                                           | 7.9                               | E44/M49-F-212 (L. sativa)       | AFLP           | 0.326          | 0.674           | 0.370           | 0.571           | 0.703             | -                 | 0.681             | 0.440 | 0.253 |
| 3                                           | 8.8                               | NBS-01 (L. serriola)            | NBS            | 0.837          | -               | 0.402           | -               | -                 | -                 | 0.934             | -     | 0.264 |
| 3                                           | 11.6                              | E44/M49-F-082 (L. sativa)       | AFLP           | 0.261          | 0.761           | 0.337           | 0.462           | 0.791             | -                 | 0.571             | 0.560 | 0.253 |
| 3                                           | 13.1                              | C09C-AAT-305 (L. serriola)      | SSAP           | 0.891          | -               | 0.337           | -               | -                 | -                 | 0.978             | -     | 0.176 |
| 3                                           | 18.8                              | C09C-CTG-328 (L. serriola)      | SSAP           | 0.870          | -               | 0.359           | -               | -                 | -                 | 0.967             | -     | 0.209 |
| 3                                           | 21.5                              | E45/M48-F-207 (L. serriola)     | AFLP           | 0.326          | 0.630           | 0.435           | 0.582           | 0.681             | -                 | 0.692             | 0.396 | 0.275 |
| 3                                           | 24.2                              | C09C-CTA-600 (L. sativa)        | SSAP           | 0.304          | -               | 0.913           | 0.560           | -                 | 0.714             | 0.593             | -     | 0.681 |
| 3                                           | 26.5                              | NBS-34 (L. sativa)              | NBS            | 0.293          | -               | 0.924           | 0.527           | -                 | 0.736             | 0.549             | -     | 0.725 |
| 3                                           | 27.2                              | E35/M59-F-281 (L. serriola)     | AFLP           | 0.283          | 0.663           | 0.435           | 0.538           | 0.736             | -                 | 0.637             | 0.451 | 0.297 |
| 3                                           | 29.7                              | C09C-CTA-325 (L. sativa)        | SSAP           | 0.293          | -               | 0.913           | 0.538           | -                 | 0.736             | 0.560             | -     | 0.714 |
| 3                                           | 37.1                              | E44/M49-F-479 (L. sativa)       | AFLP           | 0.380          | 0.630           | 0.380           | 0.637           | 0.637             | -                 | 0.758             | 0.374 | 0.220 |
| 3                                           | 44.9                              | E44/M49-F-362 (L. sativa)       | AFLP           | 0.272          | 0.717           | 0.380           | 0.495           | 0.769             | -                 | 0.604             | 0.505 | 0.275 |
| 3                                           | 46.6                              | E45/M48-F-287 (L. serriola)     | AFLP           | 0.196          | 0.674           | 0.489           | 0.407           | 0.846             | -                 | 0.484             | 0.527 | 0.385 |
| 3                                           | 47.1                              | NBS-18 (L. sativa)              | NBS            | 0.272          | -               | 0.935           | 0.505           | -                 | 0.758             | 0.495             | -     | 0.769 |
| 3                                           | 50.8                              | C09C-ACG-011 (L. serriola)      | SSAP           | 0.750          | -               | 0.522           | -               | -                 | -                 | 0.802             | -     | 0.462 |
| 3                                           | 52                                | NBS-20 (L. serriola)            | NBS            | 0.783          | -               | 0.478           | -               | -                 | -                 | 0.857             | -     | 0.385 |
| 3                                           | 52.2                              | 1A36-F-195 (L. sativa)          | AFLP           | 0.174          | 0.685           | 0.500           | 0.363           | 0.879             | -                 | 0.429             | 0.560 | 0.418 |
| 3                                           | 52.4                              | 1A31-F-107 (L. sativa)          | AFLP           | 0.228          | 0.674           | 0.467           | 0.451           | 0.813             | -                 | 0.538             | 0.505 | 0.352 |
| 3                                           | 52.5                              | E35/M59-F-299 (L. sativa)       | AFLP           | 0.228          | 0.674           | 0.467           | 0.451           | 0.802             | -                 | 0.538             | 0.505 | 0.352 |
| 3                                           | 53.1                              | C09C-CTA-142 (L. sativa)        | SSAP           | 0.196          | -               | 0.967           | 0.385           | -                 | 0.857             | 0.275             | -     | 0.934 |
| 3                                           | 58.8                              | C09C-GTT-241 (L. serriola)      | SSAP           | 0.826          | -               | 0.435           | -               | -                 | -                 | 0.912             | -     | 0.308 |
| 3                                           | 72.5                              | 1A31-F-122 (L. serriola)        | AFLP           | 0.250          | 0.685           | 0.424           | 0.484           | 0.780             | -                 | 0.582             | 0.495 | 0.308 |
| 3                                           | 72.5                              | NBS-32 (L. serriola)            | NBS            | 0.815          | -               | 0.446           | -               | -                 | -                 | 0.890             | -     | 0.330 |
| 3                                           | 73.1                              | 1A31-F-124 (L. serriola)        | AFLP           | 0.250          | 0.685           | 0.446           | 0.484           | 0.769             | -                 | 0.582             | 0.484 | 0.319 |
| 3                                           | 83                                | NBS-35 (L. serriola)            | NBS            | 0.761          | -               | 0.500           | -               | -                 | -                 | 0.824             | -     | 0.440 |
| 3                                           | 87.8                              | C09C-GTG-070 (L. sativa)        | SSAP           | 0.293          | -               | 0.913           | 0.538           | -                 | 0.736             | 0.560             | -     | 0.714 |
| 3                                           | 89                                | C09C-ATA-006 (L. serriola)      | SSAP           | 0.837          | -               | 0.413           | -               | -                 | -                 | 0.923             | -     | 0.275 |
| 3                                           | 106.6                             | NBS-09 (L. sativa)              | NBS            | 0.207          | -               | 0.967           | 0.407           | -                 | 0.846             | 0.308             | -     | 0.912 |
| 3                                           | 112.4                             | C09C-CTG-380 (L. serriola)      | SSAP           | 0.870          | -               | 0.359           | -               | -                 | -                 | 0.967             | -     | 0.209 |
| 3                                           | 117.2                             | E35/M59-F-193 (L. sativa)       | AFLP           | 0.293          | 0.750           | 0.326           | 0.505           | 0.758             | -                 | 0.626             | 0.527 | 0.231 |
| 3                                           | 117.2                             | E35/M59-F-187 (L. serriola)     | AFLP           | 0.261          | 0.739           | 0.359           | 0.473           | 0.791             | -                 | 0.571             | 0.549 | 0.264 |
| 3                                           | 125.1                             | 1A31-F-347 (L. serriola)        | AFLP           | 0.250          | 0.717           | 0.391           | 0.462           | 0.791             | -                 | 0.571             | 0.527 | 0.297 |
| 3                                           | 129.6                             | C09C-CTA-285 (L. sativa)        | SSAP           | 0.272          | -               | 0.935           | 0.495           | -                 | 0.769             | 0.484             | -     | 0.780 |
| 3                                           | 130.2                             | C09C-TCC-181 (L. serriola)      | SSAP           | 0.880          | -               | 0.348           | -               | -                 | -                 | 0.978             | -     | 0.187 |
| 4                                           | 17.5                              | C09C-TCC-202 (L. sativa)        | SSAP           | 0.413          | -               | 0.837           | 0.681           | -                 | 0.593             | 0.813             | -     | 0.440 |
| 4                                           | 25                                | C09C-GTT-148 (L. sativa)        | SSAP           | 0.435          | -               | 0.826           | 0.692           | -                 | 0.571             | 0.846             | -     | 0.396 |
| 4                                           | 36.9                              | E35/M59-F-220 (L. sativa)       | AFLP           | 0.380          | 0.652           | 0.359           | 0.626           | 0.637             | -                 | 0.747             | 0.385 | 0.220 |
| 4                                           | 49.1                              | E35/M59-F-276 (L. sativa)       | AFLP           | 0.478          | 0.554           | 0.370           | 0.747           | 0.516             | -                 | 0.857             | 0.264 | 0.187 |
| 4                                           | 52.1                              | C09C-TCC-281 (L. sativa)        | SSAP           | 0.380          | -               | 0.859           | 0.637           | -                 | 0.637             | 0.747             | -     | 0.516 |
| 4                                           | 58.8                              | C09C-ATT-009 (L. sativa)        | SSAP           | 0.348          | -               | 0.880           | 0.604           | -                 | 0.670             | 0.692             | -     | 0.582 |
| 4                                           | 60.8                              | C09C-ATT-010 (L. sativa)        | SSAP           | 0.348          | -               | 0.880           | 0.604           | -                 | 0.670             | 0.692             | -     | 0.582 |
| 4                                           | 63.4                              | C09C-GTG-310 (L. sativa)        | SSAP           | 0.337          | -               | 0.891           | 0.582           | -                 | 0.681             | 0.659             | -     | 0.615 |
| 4                                           | 75.8                              | E45/M48-F-071 (L. serriola)     | AFLP           | 0.359          | 0.554           | 0.489           | 0.670           | 0.604             | -                 | 0.769             | 0.308 | 0.275 |
| 4                                           | 83.4                              | C09C-CTT-012 (L. sativa)        | SSAP           | 0.380          | -               | 0.859           | 0.637           | -                 | 0.637             | 0.758             | -     | 0.505 |
| 4                                           | 94.1                              | C09C-ACT-005 (L. sativa)        | SSAP           | 0.293          | -               | 0.913           | 0.538           | -                 | 0.736             | 0.560             | -     | 0.714 |
| 4                                           | 100.5                             | C09C-CTA-102 (L. sativa)        | SSAP           | 0.228          | -               | 0.957           | 0.429           | -                 | 0.824             | 0.363             | -     | 0.879 |
| 4                                           | 102.9                             | C09C-CTC-001 (L. sativa)        | SSAP           | 0.228          | -               | 0.957           | 0.429           | -                 | 0.824             | 0.352             | -     | 0.879 |
| 4                                           | 104.7                             | C09C-CTC-020 (L. sativa)        | SSAP           | 0.196          | -               | 0.967           | 0.385           | -                 | 0.857             | 0.275             | -     | 0.934 |
| 4                                           | 106.7                             | C09C-CTC-021 (L. serriola)      | SSAP           | 0.728          | -               | 0.543           | -               | -                 | -                 | 0.747             | -     | 0.516 |
| 4                                           | 109.2                             | C09C-TCC-167 (L. serriola)      | SSAP           | 0.783          | -               | 0.467           | -               | -                 | -                 | 0.868             | -     | 0.374 |
| 4                                           | 112.2                             | 1A31-F-259 (L. sativa)          | AFLP           | 0.185          | 0.609           | 0.565           | 0.407           | 0.835             | -                 | 0.484             | 0.484 | 0.440 |
| 4                                           | 153.3                             | C09C-CTC-010 (L. serriola)      | SSAP           | 0.891          | -               | 0.337           | -               | -                 | -                 | 0.978             | -     | 0.176 |
| 4                                           | 157.8                             | 1A36-F-250 (L. sativa)          | AFLP           | 0.326          | 0.717           | 0.337           | 0.549           | 0.714             | -                 | 0.670             | 0.473 | 0.231 |
| 4                                           | 160.5                             | C09C-GTG-193 (L. sativa)        | SSAP           | 0.380          | -               | 0.859           | 0.637           | -                 | 0.637             | 0.758             | -     | 0.516 |

|                                             |                           |                                 |             | S <sub>1</sub> | S <sub>1</sub> | S <sub>1</sub> | BC <sub>1</sub> | BC <sub>1</sub> | BC <sub>1</sub> | BC <sub>1S1</sub> | BC <sub>1S1</sub> | BC <sub>1S1</sub> |
|---------------------------------------------|---------------------------|---------------------------------|-------------|----------------|----------------|----------------|-----------------|-----------------|-----------------|-------------------|-------------------|-------------------|
|                                             |                           |                                 |             | L.seriola      | Hetero-zygous  | L. sativa      | L.seriola       | Hetero-zygous   | L. sativa       | L.seriola         | Hetero-zygous     | L. sativa         |
| Mendelian                                   | Co-dominant               |                                 |             | 0.25           | 0.5            | 0.25           | 0.5             | 0.5             | -               | 0.625             | 0.25              | 0.125             |
| Mendelian                                   | Dominant: L. seriola band |                                 |             | 0.75           | -              | 0.25           | -               | -               | -               | 0.375             | -                 | 0.125             |
| Mendelian                                   | Dominant: L. sativa band  |                                 |             | 0.25           | -              | 0.75           | 0.5             | -               | 0.5             | 0.625             | -                 | 0.375             |
| Number of valid loci per generation         |                           |                                 |             |                | 220            |                |                 | 158             |                 |                   | 211               |                   |
| Number of valid plants tested (N)           |                           |                                 |             |                | 92             |                |                 | 91              |                 |                   | 90                |                   |
| Resulting alpha (1/ #loci per generation) = |                           |                                 |             |                | 0.0045         |                |                 | 0.0063          |                 |                   | 0.0047            |                   |
| # value in ranked 50,000 bootstrap array    |                           |                                 |             |                | 49773          |                |                 | 49684           |                 |                   | 49764             |                   |
| LG                                          | cMorgan                   | Loci (incl band presence state) | Marker type |                |                |                |                 |                 |                 |                   |                   |                   |
| 5                                           | 0                         | NBS-24 (L. seriola)             | NBS         | 0.902          | -              | 0.315          | -               | -               | -               | 0.989             | -                 | 0.154             |
| 5                                           | 3.3                       | C09C-CTC-017 (L. sativa)        | SSAP        | 0.413          | -              | 0.837          | 0.670           | -               | 0.593           | 0.813             | -                 | 0.440             |
| 5                                           | 8.3                       | C09C-ATC-006 (L. seriola)       | SSAP        | 0.891          | -              | 0.337          | -               | -               | -               | 0.978             | -                 | 0.176             |
| 5                                           | 13.5                      | E44/M48-F-223 (L. seriola)      | AFLP        | 0.424          | 0.663          | 0.293          | 0.659           | 0.615           | -               | 0.791             | 0.374             | 0.176             |
| 5                                           | 18.8                      | C09C-CTC-004 (L. seriola)       | SSAP        | 0.902          | -              | 0.315          | -               | -               | -               | 0.989             | -                 | 0.154             |
| 5                                           | 22.8                      | C09C-ACG-005 (L. seriola)       | SSAP        | 0.870          | -              | 0.359          | -               | -               | -               | 0.967             | -                 | 0.209             |
| 5                                           | 28.4                      | C09C-AAT-162 (L. seriola)       | SSAP        | 0.870          | -              | 0.359          | -               | -               | -               | 0.967             | -                 | 0.209             |
| 5                                           | 35.9                      | 1A31-F-129 (L. seriola)         | AFLP        | 0.435          | 0.587          | 0.370          | 0.703           | 0.560           | -               | 0.824             | 0.308             | 0.198             |
| 5                                           | 43.7                      | 1A31-F-224 (L. sativa)          | AFLP        | 0.446          | 0.576          | 0.370          | 0.714           | 0.560           | -               | 0.835             | 0.297             | 0.198             |
| 5                                           | 46                        | C09C-ATT-014 (L. seriola)       | SSAP        | 0.870          | -              | 0.359          | -               | -               | -               | 0.967             | -                 | 0.209             |
| 5                                           | 66                        | C09C-CTG-96 (L. sativa)         | SSAP        | 0.391          | -              | 0.848          | 0.648           | -               | 0.626           | 0.780             | -                 | 0.484             |
| 5                                           | 66.6                      | C09C-ATC-005 (L. sativa)        | SSAP        | 0.359          | -              | 0.870          | 0.615           | -               | 0.659           | 0.725             | -                 | 0.549             |
| 5                                           | 70.8                      | C09C-ATC-002 (L. seriola)       | SSAP        | 0.848          | -              | 0.402          | -               | -               | -               | 0.945             | -                 | 0.253             |
| 5                                           | 72.6                      | C09C-ACG-013 (L. seriola)       | SSAP        | 0.870          | -              | 0.370          | -               | -               | -               | 0.956             | -                 | 0.220             |
| 5                                           | 75.6                      | C09C-AAT-200 (L. sativa)        | SSAP        | 0.424          | -              | 0.826          | 0.692           | -               | 0.582           | 0.835             | -                 | 0.407             |
| 5                                           | 78.5                      | C09C-ACT-009 (L. sativa)        | SSAP        | 0.293          | -              | 0.913          | 0.538           | -               | 0.736           | 0.560             | -                 | 0.714             |
| 5                                           | 84.6                      | C09C-AAT-172 (L. sativa)        | SSAP        | 0.304          | -              | 0.913          | 0.580           | -               | 0.714           | 0.593             | -                 | 0.681             |
| 5                                           | 86.7                      | 1A36-F-160 (L. seriola)         | AFLP        | 0.348          | 0.663          | 0.370          | 0.593           | 0.681           | -               | 0.714             | 0.418             | 0.231             |
| 5                                           | 107.9                     | E44/M49-F-316 (L. seriola)      | AFLP        | 0.207          | 0.685          | 0.478          | 0.429           | 0.824           | -               | 0.516             | 0.516             | 0.363             |
| 5                                           | 109.6                     | E45/M48-F-127 (L. seriola)      | AFLP        | 0.261          | 0.554          | 0.554          | 0.560           | 0.703           | -               | 0.648             | 0.363             | 0.363             |
| 5                                           | 110.3                     | E35/M59-F-129 (L. seriola)      | AFLP        | 0.315          | 0.630          | 0.446          | 0.582           | 0.692           | -               | 0.681             | 0.407             | 0.286             |
| 5                                           | 111                       | C09C-GTG-111 (L. sativa)        | SSAP        | 0.304          | -              | 0.913          | 0.560           | -               | 0.714           | 0.593             | -                 | 0.681             |
| 5                                           | 111.5                     | C09C-GTT-213 (L. seriola)       | SSAP        | 0.848          | -              | 0.402          | -               | -               | -               | 0.934             | -                 | 0.264             |
| 5                                           | 112.8                     | C09C-CTG-178 (L. sativa)        | SSAP        | 0.293          | -              | 0.913          | 0.538           | -               | 0.725           | 0.560             | -                 | 0.714             |
| 5                                           | 117.3                     | E35/M59-F-270 (L. sativa)       | AFLP        | 0.391          | 0.641          | 0.370          | 0.648           | 0.626           | -               | 0.758             | 0.374             | 0.220             |
| 5                                           | 120.1                     | NBS-10 (L. sativa)              | NBS         | 0.315          | -              | 0.902          | 0.560           | -               | 0.714           | 0.604             | -                 | 0.670             |
| 5                                           | 126.2                     | E35/M59-F-178 (L. seriola)      | AFLP        | 0.370          | 0.543          | 0.489          | 0.670           | 0.593           | -               | 0.780             | 0.308             | 0.264             |
| 5                                           | 126.5                     | E35/M59-F-182 (L. sativa)       | AFLP        | 0.370          | 0.533          | 0.511          | 0.681           | 0.582           | -               | 0.780             | 0.286             | 0.275             |
| 5                                           | 129                       | NBS-22 (L. seriola)             | NBS         | 0.728          | -              | 0.533          | -               | -               | -               | 0.758             | -                 | 0.505             |
| 5                                           | 131.5                     | C09C-AAT-431 (L. sativa)        | SSAP        | 0.207          | -              | 0.967          | 0.407           | -               | 0.835           | 0.319             | -                 | 0.912             |
| 5                                           | 133.2                     | 1A36-F-156 (L. seriola)         | AFLP        | 0.380          | 0.522          | 0.489          | 0.703           | 0.571           | -               | 0.802             | 0.286             | 0.264             |
| 5                                           | 134.3                     | NBS26 (L. sativa)               | NBS         | 0.359          | -              | 0.870          | 0.615           | -               | 0.659           | 0.714             | -                 | 0.560             |
| 5                                           | 140.2                     | C09C-AAT-340 (L. seriola)       | SSAP        | 0.859          | -              | 0.380          | -               | -               | -               | 0.956             | -                 | 0.242             |
| 5                                           | 163.9                     | E35/M59-F-198 (L. sativa)       | AFLP        | 0.370          | 0.652          | 0.370          | 0.626           | 0.648           | -               | 0.747             | 0.396             | 0.220             |
| 6                                           | 7.1                       | NBS-07 (L. seriola)             | NBS         | 0.859          | -              | 0.380          | -               | -               | -               | 0.956             | -                 | 0.231             |
| 6                                           | 7.8                       | 1A36-F-304 (L. sativa)          | AFLP        | 0.359          | 0.663          | 0.370          | 0.604           | 0.670           | -               | 0.725             | 0.407             | 0.231             |
| 6                                           | 11.7                      | C09C-ATT-013 (L. sativa)        | SSAP        | 0.293          | -              | 0.913          | 0.538           | -               | 0.736           | 0.560             | -                 | 0.714             |
| 6                                           | 40                        | C09C-ACG-004 (L. seriola)       | SSAP        | 0.815          | -              | 0.435          | -               | -               | -               | 0.912             | -                 | 0.319             |
| 6                                           | 43.4                      | C09C-AAG-005 (L. seriola)       | SSAP        | 0.870          | -              | 0.370          | -               | -               | -               | 0.956             | -                 | 0.220             |
| 6                                           | 45.1                      | E35/M59-F-217 (L. sativa)       | AFLP        | 0.402          | 0.641          | 0.348          | 0.648           | 0.626           | -               | 0.780             | 0.374             | 0.198             |
| 6                                           | 45.7                      | C09C-ATT-005 (L. sativa)        | SSAP        | 0.326          | -              | 0.902          | 0.571           | -               | 0.703           | 0.626             | -                 | 0.648             |
| 6                                           | 53.7                      | C09C-ACG-012 (L. sativa)        | SSAP        | 0.413          | -              | 0.837          | 0.670           | -               | 0.593           | 0.824             | -                 | 0.429             |
| 6                                           | 55.6                      | C09C-AAG-008 (L. sativa)        | SSAP        | 0.402          | -              | 0.837          | 0.670           | -               | 0.604           | 0.813             | -                 | 0.451             |
| 6                                           | 56.6                      | C09C-CTT-006 (L. sativa)        | SSAP        | 0.435          | -              | 0.826          | 0.692           | -               | 0.571           | 0.846             | -                 | 0.396             |
| 6                                           | 71.6                      | E35/M59-F-103 (L. sativa)       | AFLP        | 0.478          | 0.587          | 0.315          | 0.736           | 0.538           | -               | 0.857             | 0.297             | 0.165             |
| 6                                           | 82.8                      | C09C-CTC-008 (L. sativa)        | SSAP        | 0.435          | -              | 0.826          | 0.692           | -               | 0.582           | 0.846             | -                 | 0.396             |
| 6                                           | 82.9                      | C09C-CTA-253 (L. seriola)       | SSAP        | 0.870          | -              | 0.359          | -               | -               | -               | 0.967             | -                 | 0.209             |
| 7                                           | 3.8                       | C09C-GTT-155 (L. seriola)       | SSAP        | 0.891          | -              | 0.337          | -               | -               | -               | 0.978             | -                 | 0.187             |
| 7                                           | 4.3                       | C09C-CTA-406 (L. seriola)       | SSAP        | 0.902          | -              | 0.315          | -               | -               | -               | 0.989             | -                 | 0.154             |
| 7                                           | 6.3                       | C09C-ATA-004 (L. sativa)        | SSAP        | 0.337          | -              | 0.891          | 0.593           | -               | 0.681           | 0.670             | -                 | 0.604             |
| 7                                           | 14.2                      | E44/M49-F-248 (L. sativa)       | AFLP        | 0.391          | 0.652          | 0.337          | 0.637           | 0.626           | -               | 0.769             | 0.385             | 0.198             |
| 7                                           | 15.3                      | 1A36-F-171 (L. sativa)          | AFLP        | 0.380          | 0.652          | 0.359          | 0.626           | 0.648           | -               | 0.758             | 0.385             | 0.220             |
| 7                                           | 15.6                      | C09C-ACG-002 (L. seriola)       | SSAP        | 0.870          | -              | 0.359          | -               | -               | -               | 0.967             | -                 | 0.209             |
| 7                                           | 15.9                      | E45/M48-F-142 (L. sativa)       | AFLP        | 0.391          | 0.641          | 0.359          | 0.637           | 0.637           | -               | 0.769             | 0.374             | 0.209             |
| 7                                           | 17.7                      | C09C-ACT-010 (L. seriola)       | SSAP        | 0.891          | -              | 0.326          | -               | -               | -               | 0.978             | -                 | 0.176             |
| 7                                           | 25.6                      | C09C-AAT-098 (L. sativa)        | SSAP        | 0.359          | -              | 0.870          | 0.615           | -               | 0.659           | 0.725             | -                 | 0.549             |
| 7                                           | 30.9                      | C09C-AAG-007 (L. sativa)        | SSAP        | 0.337          | -              | 0.891          | 0.582           | -               | 0.681           | 0.659             | -                 | 0.615             |
| 7                                           | 40.4                      | C09C-ACT-013 (L. seriola)       | SSAP        | 0.880          | -              | 0.348          | -               | -               | -               | 0.978             | -                 | 0.187             |
| 7                                           | 42.1                      | NBS-04 (L. sativa)              | NBS         | 0.380          | -              | 0.859          | 0.648           | -               | 0.626           | 0.769             | -                 | 0.495             |
| 7                                           | 43.5                      | NBS-16 (L. sativa)              | NBS         | 0.370          | -              | 0.870          | 0.626           | -               | 0.648           | 0.747             | -                 | 0.527             |
| 7                                           | 50.6                      | C09C-CTG-112 (L. seriola)       | SSAP        | 0.870          | -              | 0.359          | -               | -               | -               | 0.967             | -                 | 0.209             |
| 7                                           | 60.5                      | C09C-ACT-006 (L. seriola)       | SSAP        | 0.913          | -              | 0.304          | -               | -               | -               | 0.989             | -                 | 0.143             |
| 7                                           | 61.6                      | 1A31-F-170 (L. seriola)         | AFLP        | 0.283          | 0.728          | 0.359          | 0.505           | 0.758           | -               | 0.615             | 0.505             | 0.253             |
| 7                                           | 63.2                      | E35/M59-F-101 (L. seriola)      | AFLP        | 0.217          | 0.696          | 0.457          | 0.440           | 0.824           | -               | 0.527             | 0.527             | 0.341             |
| 7                                           | 66.8                      | C09C-CTT-002 (L. seriola)       | SSAP        | 0.880          | -              | 0.359          | -               | -               | -               | 0.967             | -                 | 0.198             |
| 7                                           | 68.6                      | C09C-ACT-001 (L. seriola)       | SSAP        | 0.859          | -              | 0.380          | -               | -               | -               | 0.956             | -                 | 0.231             |
| 7                                           | 90.7                      | 1A36-F-223 (L. sativa)          | AFLP        | 0.337          | 0.696          | 0.348          | 0.571           | 0.703           | -               | 0.681             | 0.451             | 0.231             |
| 7                                           | 97                        | C09C-ATA-009 (L. seriola)       | SSAP        | 0.891          | -              | 0.337          | -               | -               | -               | 0.978             | -                 | 0.187             |
| 8                                           | 0                         | C09C-GTT-270 (L. sativa)        | SSAP        | 0.391          | -              | 0.848          | 0.659           | -               | 0.615           | 0.791             | -                 | 0.473             |
| 8                                           | 0.5                       | C09C-CTC-014 (L. seriola)       | SSAP        | 0.913          | -              | 0.293          | -               | -               | -               | 0.989             | -                 | 0.132             |
| 8                                           | 5.1                       | NBS-11 (L. seriola)             | NBS         | 0.880          | -              | 0.337          | -               | -               | -               | 0.978             | -                 | 0.187             |
| 8                                           | 9.5                       | E45/M48-F-067 (L. seriola)      | AFLP        | 0.348          | 0.609          | 0.435          | 0.626           | 0.648           | -               | 0.736             | 0.363             | 0.264             |
| 8                                           | 18.4                      | E44/M49-F-262 (L. sativa)       | AFLP        | 0.413          | 0.620          | 0.359          | 0.681           | 0.593           | -               | 0.802             | 0.341             | 0.198             |
| 8                                           | 25.6                      | NBS-08 (L. seriola)             | NBS         | 0.891          | -              | 0.337          | -               | -               | -               | 0.978             | -                 | 0.176             |
| 8                                           | 31.5                      | C09C-CTC-005 (L. sativa)        | SSAP        | 0.413          | -              | 0.837          | 0.681           | -               | 0.593           | 0.813             | -                 | 0.440             |
| 8                                           | 57.4                      | C09C-ATC-009 (L. seriola)       | SSAP        | 0.913          | -              | 0.293          | -               | -               | -               | 0.989             | -                 | 0.132             |
| 8                                           | 57.9                      | E35/M59-F-153 (L. sativa)       | AFLP        | 0.435          | 0.663          | 0.283          | 0.670           | 0.604           | -               | 0.791             | 0.374             | 0.165             |
| 8                                           | 60.8                      | 1A36-F-127 (L. sativa)          | AFLP        | 0.413          | 0.728          | 0.217          | 0.626           | 0.648           | -               | 0.758             | 0.440             | 0.132             |
| 8                                           | 64.2                      | C09C-CTG-370 (L. sativa)        | SSAP        | 0.359          | -              | 0.880          | 0.604           | -               | 0.670           | 0.703             | -                 | 0.571             |
| 8                                           | 72.1                      | 1A31-F-146 (L. seriola)         | AFLP        | 0.413          | 0.674          | 0.283          | 0.648           | 0.626           | -               | 0.780             | 0.396             | 0.165             |
| 8                                           | 79.3                      | C09C-ATT-004 (L. seriola)       | SSAP        | 0.935          | -              | 0.272          | -               | -               | -               | 1.000             | -                 | 0.110             |
| 8                                           | 80.6                      | E44/M48-F-141 (L. sativa)       | AFLP        | 0.391          | 0.717          | 0.261          | 0.604           | 0.670           | -               | 0.736             | 0.451             | 0.165             |
| 8                                           | 90.2                      | C09C-CTC-012 (L. sativa)        | SSAP        | 0.391          | -              | 0.848          | 0.648           | -               | 0.626           | 0.780             | -                 | 0.484             |
| 8                                           | 128.2                     | 1A36-F-323 (L. sativa)          | AFLP        | 0.413          | 0.685          | 0.283          | 0.637           |                 |                 |                   |                   |                   |

|                                             |                           | S <sub>1</sub>                  | S <sub>1</sub> | S <sub>1</sub> | BC <sub>1</sub> | BC <sub>1</sub> | BC <sub>1</sub> | BC <sub>1S1</sub> | BC <sub>1S1</sub> | BC <sub>1S1</sub> |       |       |
|---------------------------------------------|---------------------------|---------------------------------|----------------|----------------|-----------------|-----------------|-----------------|-------------------|-------------------|-------------------|-------|-------|
|                                             |                           | L.seriola                       | Hetero-zygous  | L. sativa      | L.seriola       | Hetero-zygous   | L. sativa       | L.seriola         | Hetero-zygous     | L. sativa         |       |       |
| Mendelian                                   | Co-dominant               | 0.25                            | 0.5            | 0.25           | 0.5             | 0.5             | -               | 0.625             | 0.25              | 0.125             |       |       |
| Mendelian                                   | Dominant: L. seriola band | 0.75                            | -              | 0.25           | -               | -               | -               | 0.375             | -                 | 0.125             |       |       |
| Mendelian                                   | Dominant: L. sativa band  | 0.25                            | -              | 0.75           | 0.5             | -               | 0.5             | 0.625             | -                 | 0.375             |       |       |
| Number of valid loci per generation         |                           | 220                             |                |                | 158             |                 |                 | 211               |                   |                   |       |       |
| Number of valid plants tested (N)           |                           | 92                              |                |                | 91              |                 |                 | 90                |                   |                   |       |       |
| Resulting alpha (1/ #loci per generation) = |                           | 0.0045                          |                |                | 0.0063          |                 |                 | 0.0047            |                   |                   |       |       |
| # value in ranked 50,000 bootstrap array    |                           | 49773                           |                |                | 49684           |                 |                 | 49764             |                   |                   |       |       |
| LG                                          | cMorgan                   | Loci (incl band presence state) | Marker type    |                |                 |                 |                 |                   |                   |                   |       |       |
| 8                                           | 143.3                     | E44/M48-F-192 (L. sativa)       | AFLP           | 0.337          | 0.696           | 0.348           | 0.571           | 0.703             | -                 | 0.692             | 0.451 | 0.231 |
| 9                                           | 0                         | NBS-02 (L. seriola)             | NBS            | 0.935          | -               | 0.272           | -               | -                 | -                 | 1.000             | -     | 0.110 |
| 9                                           | 20.3                      | C09C-GTG-151 (L. seriola)       | SSAP           | 0.837          | -               | 0.413           | -               | -                 | -                 | 0.934             | -     | 0.275 |
| 9                                           | 24.4                      | C09C-AAG-003 (L. sativa)        | SSAP           | 0.435          | -               | 0.815           | 0.703           | -                 | 0.571             | 0.857             | -     | 0.385 |
| 9                                           | 28.1                      | C09C-ACT-015 (L. sativa)        | SSAP           | 0.413          | -               | 0.837           | 0.670           | -                 | 0.604             | 0.824             | -     | 0.440 |
| 9                                           | 36.5                      | C09C-ATC-008 (L. sativa)        | SSAP           | 0.402          | -               | 0.848           | 0.659           | -                 | 0.615             | 0.791             | -     | 0.462 |
| 9                                           | 46.4                      | 1A36-F-189 (L. sativa)          | AFLP           | 0.435          | 0.630           | 0.326           | 0.681           | 0.582             | -                 | 0.813             | 0.341 | 0.176 |
| 9                                           | 49.5                      | C09C-CTC-002 (L. sativa)        | SSAP           | 0.467          | -               | 0.793           | 0.725           | -                 | 0.538             | 0.890             | -     | 0.341 |
| 9                                           | 53.1                      | C09C-ATC-001 (L. sativa)        | SSAP           | 0.446          | -               | 0.815           | 0.714           | -                 | 0.560             | 0.868             | -     | 0.374 |
| 9                                           | 60.7                      | E44/M49-F-175 (L. seriola)      | AFLP           | 0.380          | 0.652           | 0.348           | 0.637           | 0.637             | -                 | 0.747             | 0.385 | 0.209 |
| 9                                           | 81.4                      | C09C-CTA-098 (L. seriola)       | SSAP           | 0.848          | -               | 0.391           | -               | -                 | -                 | 0.945             | -     | 0.253 |
| 9                                           | 92.6                      | C09C-CTT-007 (L. sativa)        | SSAP           | 0.283          | -               | 0.924           | 0.527           | -                 | 0.747             | 0.538             | -     | 0.736 |
| 9                                           | 95.6                      | 1A31-F-176 (L. seriola)         | AFLP           | 0.261          | 0.696           | 0.413           | 0.495           | 0.769             | -                 | 0.593             | 0.495 | 0.297 |
| 9                                           | 100.2                     | NBS-19 (L. sativa)              | NBS            | 0.359          | -               | 0.870           | 0.615           | -                 | 0.659             | 0.725             | -     | 0.549 |
| 9                                           | 102.5                     | NBS-25 (L. seriola)             | NBS            | 0.859          | -               | 0.380           | -               | -                 | -                 | 0.956             | -     | 0.231 |
| 9                                           | 106.1                     | C09C-TCC-123 (L. seriola)       | SSAP           | 0.946          | -               | 0.239           | -               | -                 | -                 | 1.000             | -     | 0.088 |
| 9                                           | 108.1                     | E35/M59-F-183 (L. sativa)       | AFLP           | 0.348          | 0.739           | 0.272           | 0.560           | 0.714             | -                 | 0.681             | 0.484 | 0.187 |
| 9                                           | 113.1                     | E35/M59-F-096 (L. sativa)       | AFLP           | 0.359          | 0.652           | 0.380           | 0.615           | 0.659             | -                 | 0.736             | 0.396 | 0.242 |
| 9                                           | 122.5                     | C09C-ATA-007 (L. sativa)        | SSAP           | 0.326          | -               | 0.902           | 0.571           | -                 | 0.692             | 0.637             | -     | 0.637 |
| 9                                           | 127.7                     | C09C-AAG-004 (L. seriola)       | SSAP           | 0.859          | -               | 0.380           | -               | -                 | -                 | 0.956             | -     | 0.231 |
| 9                                           | 133.4                     | C09C-ACT-007 (L. sativa)        | SSAP           | 0.315          | -               | 0.902           | 0.549           | -                 | 0.714             | 0.593             | -     | 0.681 |
| 9                                           | 137                       | C09C-ACT-002 (L. seriola)       | SSAP           | 0.815          | -               | 0.435           | -               | -                 | -                 | 0.912             | -     | 0.308 |
| u                                           | u                         | C09C-ATT-011 (L. sativa)        | SSAP           | 0.337          | -               | 0.891           | 0.582           | -                 | 0.681             | 0.659             | -     | 0.615 |
| u                                           | u                         | E44/M48-F-212 (L. seriola)      | AFLP           | 0.348          | 0.598           | 0.457           | 0.626           | 0.648             | -                 | 0.736             | 0.363 | 0.275 |
| u                                           | u                         | 1A31-F-074 (L. sativa)          | AFLP           | 0.359          | 0.587           | 0.446           | 0.648           | 0.626             | -                 | 0.747             | 0.341 | 0.264 |
| u                                           | u                         | 1A31-F-244 (L. sativa)          | AFLP           | 0.391          | 0.685           | 0.293           | 0.626           | 0.648             | -                 | 0.758             | 0.418 | 0.187 |
| u                                           | u                         | 1A31-F-323 (L. sativa)          | AFLP           | 0.380          | 0.641           | 0.370           | 0.637           | 0.637             | -                 | 0.758             | 0.374 | 0.220 |
| u                                           | u                         | 1A31-F-402 (L. sativa)          | AFLP           | 0.380          | 0.630           | 0.380           | 0.637           | 0.637             | -                 | 0.758             | 0.374 | 0.231 |
| u                                           | u                         | 1A36-F-148 (L. sativa)          | AFLP           | 0.380          | 0.630           | 0.380           | 0.637           | 0.637             | -                 | 0.758             | 0.374 | 0.220 |
| u                                           | u                         | 1A36-F-246 (L. sativa)          | AFLP           | 0.500          | 0.511           | 0.380           | 0.791           | 0.473             | -                 | 0.890             | 0.231 | 0.176 |
| u                                           | u                         | 1A36-F-299 (L. sativa)          | AFLP           | 0.380          | 0.630           | 0.380           | 0.637           | 0.637             | -                 | 0.758             | 0.374 | 0.220 |
| u                                           | u                         | 1A36-Fb-126.70 (L. sativa)      | AFLP           | 0.380          | 0.641           | 0.370           | 0.637           | 0.637             | -                 | 0.758             | 0.374 | 0.220 |
| u                                           | u                         | E35/M59-F-086 (L. sativa)       | AFLP           | 0.380          | 0.630           | 0.370           | 0.637           | 0.637             | -                 | 0.758             | 0.374 | 0.220 |
| u                                           | u                         | E35/M59-F-204 (L. sativa)       | AFLP           | 0.380          | 0.630           | 0.370           | 0.637           | 0.637             | -                 | 0.758             | 0.374 | 0.220 |
| u                                           | u                         | E35/M59-F-212 (L. sativa)       | AFLP           | 0.315          | 0.674           | 0.380           | 0.560           | 0.703             | -                 | 0.670             | 0.440 | 0.253 |
| u                                           | u                         | E44/M48-F-328 (L. sativa)       | AFLP           | 0.315          | 0.685           | 0.380           | 0.549           | 0.714             | -                 | 0.670             | 0.462 | 0.253 |
| u                                           | u                         | E44/M48-F-403 (L. sativa)       | AFLP           | 0.380          | 0.630           | 0.380           | 0.637           | 0.637             | -                 | 0.758             | 0.374 | 0.220 |
| u                                           | u                         | E44/M49-F-231 (L. sativa)       | AFLP           | 0.380          | 0.630           | 0.380           | 0.637           | 0.637             | -                 | 0.758             | 0.374 | 0.220 |
| u                                           | u                         | E44/M49-F-250 (L. sativa)       | AFLP           | 0.380          | 0.641           | 0.380           | 0.637           | 0.637             | -                 | 0.758             | 0.374 | 0.220 |
| u                                           | u                         | E44/M49-F-337 (L. sativa)       | AFLP           | 0.370          | 0.674           | 0.337           | 0.604           | 0.670             | -                 | 0.725             | 0.418 | 0.209 |
| u                                           | u                         | E45/M48-F-084 (L. sativa)       | AFLP           | 0.380          | 0.630           | 0.370           | 0.374           | 0.857             | -                 | 0.758             | 0.374 | 0.220 |
| u                                           | u                         | E45/M48-F-103 (L. sativa)       | AFLP           | 0.370          | 0.685           | 0.315           | 0.604           | 0.670             | -                 | 0.725             | 0.429 | 0.198 |
| u                                           | u                         | E45/M48-F-140 (L. sativa)       | AFLP           | 0.391          | 0.641           | 0.359           | 0.648           | 0.626             | -                 | 0.769             | 0.374 | 0.209 |
| u                                           | u                         | E45/M48-F-146 (L. sativa)       | AFLP           | 0.380          | 0.630           | 0.370           | 0.637           | 0.637             | -                 | 0.758             | 0.374 | 0.220 |
| u                                           | u                         | E45/M48-F-159 (L. sativa)       | AFLP           | 0.380          | 0.641           | 0.380           | 0.637           | 0.637             | -                 | 0.758             | 0.374 | 0.220 |
| u                                           | u                         | 1A36-F-434 (L. seriola)         | AFLP           | 0.380          | 0.630           | 0.370           | 0.637           | 0.637             | -                 | 0.758             | 0.374 | 0.231 |
| u                                           | u                         | E44/M49-F-150 (L. seriola)      | AFLP           | 0.380          | 0.641           | 0.370           | 0.637           | 0.637             | -                 | 0.758             | 0.374 | 0.220 |
| u                                           | u                         | E44/M49-F-447 (L. seriola)      | AFLP           | 0.380          | 0.641           | 0.370           | 0.637           | 0.637             | -                 | 0.758             | 0.374 | 0.231 |
| u                                           | u                         | NBS-03 (L. sativa)              | NBS            | 0.337          | -               | 0.891           | 0.593           | -                 | 0.692             | 0.659             | -     | 0.615 |
| u                                           | u                         | NBS-05 (L. sativa)              | NBS            | 0.359          | -               | 0.870           | 0.615           | -                 | 0.659             | 0.714             | -     | 0.560 |
| u                                           | u                         | NBS-27 (L. sativa)              | NBS            | 0.478          | -               | 0.783           | 0.747           | -                 | 0.527             | 0.912             | -     | 0.308 |
| u                                           | u                         | NBS-36 (L. sativa)              | NBS            | 0.707          | -               | 0.554           | 0.912           | -                 | 0.308             | 1.000             | -     | 0.088 |
| u                                           | u                         | NBS37 (L. sativa)               | NBS            | 0.761          | -               | 0.500           | 0.934           | -                 | 0.275             | 1.000             | -     | 0.077 |
| u                                           | u                         | C09C-AAT-097 (L. sativa)        | SSAP           | 0.239          | -               | 0.946           | 0.451           | -                 | 0.802             | 0.396             | -     | 0.846 |
| u                                           | u                         | C09C-AAT-153 (L. sativa)        | SSAP           | 0.402          | -               | 0.848           | 0.659           | -                 | 0.604             | 0.802             | -     | 0.462 |
| u                                           | u                         | C09C-AAT-180 (L. sativa)        | SSAP           | 0.261          | -               | 0.946           | 0.473           | -                 | 0.791             | 0.440             | -     | 0.813 |
| u                                           | u                         | C09C-AAT-208 (L. sativa)        | SSAP           | 0.141          | -               | 0.989           | 0.297           | -                 | 0.923             | 0.154             | -     | 0.989 |
| u                                           | u                         | C09C-ATA-003 (L. sativa)        | SSAP           | 0.391          | -               | 0.848           | 0.648           | -                 | 0.626             | 0.780             | -     | 0.484 |
| u                                           | u                         | C09C-ATT-001 (L. sativa)        | SSAP           | 0.435          | -               | 0.815           | 0.703           | -                 | 0.571             | 0.857             | -     | 0.385 |
| u                                           | u                         | C09C-CTT-003 (L. sativa)        | SSAP           | 0.359          | -               | 0.880           | 0.615           | -                 | 0.659             | 0.703             | -     | 0.571 |
| u                                           | u                         | C09C-CTT-009 (L. sativa)        | SSAP           | 0.380          | -               | 0.859           | 0.637           | -                 | 0.626             | 0.758             | -     | 0.505 |
| u                                           | u                         | C09C-GTG-700 (L. sativa)        | SSAP           | 0.326          | -               | 0.902           | 0.571           | -                 | 0.692             | 0.637             | -     | 0.637 |
| u                                           | u                         | C09C-GTT-238 (L. sativa)        | SSAP           | 0.348          | -               | 0.891           | 0.593           | -                 | 0.681             | 0.681             | -     | 0.593 |
| u                                           | u                         | C09-C-GTT-440 (L. sativa)       | SSAP           | 0.380          | -               | 0.859           | 0.637           | -                 | 0.637             | 0.758             | -     | 0.516 |
| u                                           | u                         | C09C-TCC-088 (L. sativa)        | SSAP           | 0.326          | -               | 0.902           | 0.571           | -                 | 0.703             | 0.626             | -     | 0.648 |
| u                                           | u                         | C09C-TCC-146 (L. sativa)        | SSAP           | 0.380          | -               | 0.859           | 0.637           | -                 | 0.637             | 0.758             | -     | 0.516 |
| u                                           | u                         | C09C-TCC-199 (L. sativa)        | SSAP           | 0.348          | -               | 0.880           | 0.604           | -                 | 0.670             | 0.692             | -     | 0.582 |
| u                                           | u                         | C09C-TCC-640 (L. sativa)        | SSAP           | 0.380          | -               | 0.859           | 0.637           | -                 | 0.637             | 0.758             | -     | 0.516 |
