# Supplementary material
Source: PubMed Central journal article supplement (PMC3352534)
Supplement: eva0004-0648-SD6.pdf [file eva0004-0648-SD6.pdf]

**Table S4. P-values per field and overall for distortion towards *L. serriola* and *L. sativa* for the BC<sub>1S1</sub> generatio**. Based on a Monte Carlo algorithm, 50,000x drawing N plants from the expected distribution per locus over all fields and n per field. Employed p-value for significance (1/# informative loci): 1/220 = 0.0047. Red is distortion towards *L. serriola*, blue is distortion towards *L. sativa*. Only significant loci joining all fields in one analyses are reported in Fig. 2, discussion of single field distortion is considered beyond our scope. For two loci below indicated in yellow significant distortion for all fields could be based on one field only (other fields: p > 0.05). For all others: at least two fields are significant or providing a similar trend (p < 0.05) suggestion a general field exposure based selection of genotypes. m.d. = missing data. See method section for full methodological details

| Number (#) | Marker name                        | Linkage group | cM   | All fields (=Fig. 2)<br>N = 90 | Amsterdam          | Sijbekarspel       | Aachen             | All fields (=Fig. 2)<br>N = 90 | Amsterdam        | Sijbekarspel     | Aachen           |                |
|------------|------------------------------------|---------------|------|--------------------------------|--------------------|--------------------|--------------------|--------------------------------|------------------|------------------|------------------|----------------|
|            |                                    |               |      | <i>L. serriola</i>             | <i>L. serriola</i> | <i>L. serriola</i> | <i>L. serriola</i> | <i>L. sativa</i>               | <i>L. sativa</i> | <i>L. sativa</i> | <i>L. sativa</i> |                |
|            | Distortion towards preference for: |               |      |                                |                    |                    |                    |                                |                  |                  |                  |                |
| 1          | E35/M59-F-127-SER                  | 1             | 4.1  | m.d.                           | m.d.               | m.d.               | m.d.               | m.d.                           | m.d.             | m.d.             | m.d.             | m.d.           |
| 2          | E45/M48-F-070-SAT                  | 1             | 16.1 | m.d.                           | m.d.               | m.d.               | m.d.               | m.d.                           | m.d.             | m.d.             | m.d.             | m.d.           |
| 3          | CO9C-CTT-013-SAT                   | 1             | 16.3 | 0.46064                        | 0.06816            | 0.67464            | 0.59182            | 0.45398                        | 0.8632           | 0.22124          | 0.25118          | 0.25118        |
| 4          | CO9C-ACG-008-SER                   | 1             | 18   | 0.99902                        | 0.98868            | 0.98394            | 0.5871             | <b>0.00032</b>                 | <b>0.00244</b>   | 0.00484          | 0.16042          | 0.16042        |
| 5          | NBS-33-sat                         | 1             | 28   | 0.9999                         | 0.48034            | 1                  | 0.87422            | 0.99988                        | 0.9955           | 0.99234          | 0.75228          | 0.75228        |
| 6          | E45/M48-F-295-SAT                  | 1             | 28.7 | 0.43614                        | 0.03542            | 0.81572            | 0.55754            | 0.94522                        | 0.20822          | 0.96656          | 0.83144          | 0.83144        |
| 7          | NBS-13-ser                         | 1             | 29.5 | 1                              | 1                  | 1                  | 0.98912            | 0.02372                        | 0.01754          | 0.53312          | 0.01088          | 0.01088        |
| 8          | E44/M48-F-297-SAT                  | 1             | 33.5 | 0.63706                        | 0.70766            | 0.02576            | 0.97474            | 0.53108                        | 0.05556          | 0.9124           | 0.33214          | 0.33214        |
| 9          | E44/M48-F-109-SAT                  | 1             | 40.9 | 0.2226                         | 0.14378            | 0.42934            | 0.34736            | 0.84908                        | 0.35944          | 0.61782          | 0.9026           | 0.9026         |
| 10         | CO9C-ATC-011-SAT                   | 1             | 71   | 1                              | 0.99998            | 1                  | 1                  | <b>0.00002</b>                 | <b>0.00002</b>   | <b>0</b>         | <b>0.00002</b>   | <b>0.00002</b> |
| 11         | E44/M48-F-114-SER                  | 1             | 78.8 | m.d.                           | m.d.               | m.d.               | m.d.               | m.d.                           | m.d.             | m.d.             | m.d.             | m.d.           |
| 12         | CO9C-ATA-005-SER                   | 1             | 86.3 | 1                              | 0.70664            | 0.99934            | 0.99928            | <b>0.00002</b>                 | 0.09074          | <b>0.00008</b>   | <b>0.00008</b>   | <b>0.00008</b> |
| 13         | E45/M48-F-297-SAT                  | 1             | 97.3 | 1                              | 0.93998            | 1                  | 1                  | 0.26708                        | 0.30998          | 0.12784          | 0.42026          | 0.42026        |
| 14         | E45/M48-F-235-SER                  | 2             | 1.9  | m.d.                           | m.d.               | m.d.               | m.d.               | m.d.                           | m.d.             | m.d.             | m.d.             | m.d.           |
| 15         | NBS-23-ser                         | 2             | 13.2 | 0.99992                        | 0.99758            | 0.99994            | m.d.               | 0.85566                        | 0.07918          | 0.93354          | 0.90404          | 0.90404        |
| 16         | CO9C-ACT-012-SAT                   | 2             | 17   | 0.8437                         | 0.97364            | 0.16532            | 0.67074            | 0.10974                        | 0.01028          | 0.7365           | 0.1897           | 0.1897         |
| 17         | E35/M59-F-273-SAT                  | 2             | 25   | m.d.                           | m.d.               | m.d.               | m.d.               | m.d.                           | m.d.             | m.d.             | m.d.             | m.d.           |
| 18         | NBS-30-ser                         | 2             | 32.4 | 1                              | 0.99996            | 1                  | 0.99818            | 0.17958                        | 0.60732          | 0.27478          | 0.02246          | 0.02246        |
| 19         | E44/M48-F-147-SAT                  | 2             | 39.6 | m.d.                           | m.d.               | m.d.               | m.d.               | m.d.                           | m.d.             | m.d.             | m.d.             | m.d.           |
| 20         | CO9C-ACT-004-SER                   | 2             | 61.4 | 1                              | 0.99906            | 1                  | 0.68924            | 0.24194                        | 0.56412          | 0.16706          | 0.14244          | 0.14244        |
| 21         | CO9C-ATC-010-SAT                   | 2             | 62.4 | 0.99982                        | 0.89164            | 0.99952            | 0.82836            | 0.03718                        | 0.10836          | 0.00876          | 0.66086          | 0.66086        |
| 22         | CO9C-CTT-008-SER                   | 2             | 65.3 | 0.99948                        | 0.99224            | 0.95202            | 0.94198            | 0.14112                        | 0.34958          | 0.22164          | 0.05802          | 0.05802        |
| 23         | CO9C-ACG-014-SAT                   | 2             | 67.4 | 0.56112                        | 0.7845             | 0.55402            | 0.13372            | 0.43888                        | 0.2155           | 0.31864          | 0.73266          | 0.73266        |
| 24         | CO9C-GTT-216-SER                   | 2             | 81.3 | 1                              | 1                  | 1                  | 0.76372            | 0.006                          | 0.07828          | 0.013            | 0.08274          | 0.08274        |
| 25         | CO9C-CTG-319-SER                   | 2             | 90.5 | 0.99986                        | 0.99896            | 0.98858            | 0.77448            | <b>0</b>                       | <b>0.0003</b>    | <b>0.00344</b>   | 0.07866          | 0.07866        |
| 26         | E44/M49-F-212-SAT                  | 3             | 7.9  | 0.02908                        | <b>0.00446</b>     | 0.66524            | 0.01062            | 0.95832                        | 0.61402          | 0.6906           | 0.96184          | 0.96184        |
| 27         | NBS-01-ser                         | 3             | 8.8  | 1                              | 0.96814            | 1                  | 0.32526            | 0.38512                        | 0.07932          | 0.30602          | 0.8714           | 0.8714         |
| 28         | E44/M49-F-082-SAT                  | 3             | 11.6 | 0.04106                        | <b>0.00396</b>     | 0.58804            | 0.0641             | 0.71928                        | 0.44082          | 0.24362          | 0.96694          | 0.96694        |
| 29         | CO9C-AAT-305-SER                   | 3             | 13.1 | 0.99988                        | 0.9994             | 0.9982             | 0.14742            | <b>0.00082</b>                 | 0.01006          | <b>0.00042</b>   | 0.55532          | 0.55532        |
| 30         | CO9C-CTG-328-SER                   | 3             | 18.8 | 0.55596                        | 0.35508            | 0.84418            | 0.0824             | 0.32224                        | 0.41016          | 0.07358          | 0.6995           | 0.6995         |
| 31         | E45/M48-F-207-SER                  | 3             | 21.5 | m.d.                           | m.d.               | m.d.               | m.d.               | m.d.                           | m.d.             | m.d.             | m.d.             | m.d.           |
| 32         | CO9C-CTA-600-SAT                   | 3             | 24.2 | 0.10164                        | 0.10966            | 0.14634            | 0.33908            | 0.85636                        | 0.80486          | 0.76956          | 0.49202          | 0.49202        |
| 33         | NBS-34-sat                         | 3             | 26.5 | <b>0.0025</b>                  | <b>0.00058</b>     | 0.59798            | <b>0.00384</b>     | 1                              | 1                | 1                | 1                | 1              |
| 34         | E35/M59-F-281-SER                  | 3             | 27.2 | m.d.                           | m.d.               | m.d.               | m.d.               | m.d.                           | m.d.             | m.d.             | m.d.             | m.d.           |
| 35         | CO9C-CTA-325-SAT                   | 3             | 29.7 | <b>0.00156</b>                 | 0.10352            | 0.01628            | 0.00556            | 0.9973                         | 0.81428          | 0.96584          | 0.98132          | 0.98132        |

| Number (#)                         | Marker name       | Linkage group | cM    | All fields (=Fig. 2)<br>N = 90 | Amsterdam<br>n = 29 | Sijbekarspel<br>n = 40 | Aachen<br>n = 21   |                  | All fields (=Fig. 2)<br>N = 90 | Amsterdam<br>n = 29 | Sijbekarspel<br>n = 40 | Aachen<br>n = 21 |
|------------------------------------|-------------------|---------------|-------|--------------------------------|---------------------|------------------------|--------------------|------------------|--------------------------------|---------------------|------------------------|------------------|
|                                    |                   |               |       | <i>L. serriola</i>             | <i>L. serriola</i>  | <i>L. serriola</i>     | <i>L. serriola</i> | <i>L. sativa</i> | <i>L. sativa</i>               | <i>L. sativa</i>    | <i>L. sativa</i>       |                  |
| Distortion towards preference for: |                   |               |       |                                |                     |                        |                    |                  |                                |                     |                        |                  |
| 36                                 | E44/M49-F-479-SAT | 3             | 37.1  | 0.98658                        | 0.96128             | 0.69354                | 0.88218            |                  | 0.71176                        | 0.28838             | 0.75398                | 0.49944          |
| 37                                 | E44/M49-F-362-SAT | 3             | 44.9  | 0.48544                        | 0.64502             | 0.18334                | 0.5465             |                  | 0.21352                        | 0.01158             | 0.47886                | 0.68162          |
| 38                                 | E45/M48-F-287-SER | 3             | 46.6  | <b>0.00054</b>                 | 0.04884             | <b>0.00164</b>         | 0.07982            |                  | 0.82642                        | 0.3211              | 0.9647                 | 0.46028          |
| 39                                 | NBS-18-sat        | 3             | 47.1  | 0.5654                         | 0.46782             | 0.81516                | 0.08628            |                  | 1                              | 0.97504             | 1                      | 0.99924          |
| 40                                 | CO9C-ACG-011-SER  | 3             | 50.8  | 0.46262                        | 0.65326             | 0.28698                | 0.2586             |                  | 0.95624                        | 0.88866             | 0.89464                | 0.56848          |
| 41                                 | NBS-20-ser        | 3             | 52    | 1                              | 0.99768             | 1                      | 0.72288            |                  | 0.99338                        | 0.7921              | 0.99634                | 0.65488          |
| 42                                 | 1A36-F-195-SAT    | 3             | 52.2  | 0.00642                        | 0.06088             | 0.0605                 | 0.02552            |                  | 0.99698                        | 0.7499              | 0.99972                | 0.57016          |
| 43                                 | 1A31-F-107-SAT    | 3             | 52.4  | 0.30568                        | 0.35338             | 0.54292                | 0.0809             |                  | 0.72062                        | 0.51002             | 0.73042                | 0.3459           |
| 44                                 | E35/M59-F-299-SAT | 3             | 52.5  | 0.04702                        | 0.5245              | 0.04218                | 0.03672            |                  | 0.98612                        | 0.68322             | 0.92368                | 0.89474          |
| 45                                 | CO9C-CTA-142-SAT  | 3             | 53.1  | <b>0.00002</b>                 | <b>0.00002</b>      | <b>0.00014</b>         | <b>0.00002</b>     |                  | 1                              | 1                   | 0.99974                | 1                |
| 46                                 | CO9C-GTT-241-SER  | 3             | 58.8  | 0.73082                        | 0.5212              | 0.50466                | 0.63488            |                  | 0.26918                        | 0.3029              | 0.49534                | 0.19434          |
| 47                                 | 1A31-F-122-SER    | 3             | 72.5  | 0.85074                        | 0.086               | 0.99096                | 0.63696            |                  | 0.60164                        | 0.68984             | 0.517                  | 0.20712          |
| 48                                 | NBS-32-ser        | 3             | 72.5  | 0.99996                        | 0.98748             | 0.99998                | 0.52746            |                  | 0.99186                        | 0.26444             | 0.9991                 | 0.85528          |
| 49                                 | 1A31-F-124-SER    | 3             | 73.1  | 0.08202                        | <b>0.00216</b>      | 0.55744                | 0.47958            |                  | 0.6624                         | 0.53786             | 0.5591                 | 0.41098          |
| 50                                 | NBS-35-ser        | 3             | 83    | m.d.                           | m.d.                | m.d.                   | m.d.               |                  | m.d.                           | m.d.                | m.d.                   | m.d.             |
| 51                                 | CO9C-GTG-070-SAT  | 3             | 87.8  | <b>0.00008</b>                 | <b>0.00084</b>      | 0.06712                | 0.02008            |                  | 0.99976                        | 0.99712             | 0.88504                | 0.9473           |
| 52                                 | CO9C-ATA-006-SER  | 3             | 89    | 1                              | 0.99412             | 1                      | 0.72726            |                  | 0.26486                        | 0.74736             | 0.12396                | 0.12776          |
| 53                                 | NBS-09-sat        | 3             | 106.6 | 0.0061                         | 0.01378             | 0.12116                | 0.03262            |                  | 1                              | 0.99964             | 1                      | 0.91468          |
| 54                                 | CO9C-CTG-380-SER  | 3             | 112.4 | 0.42304                        | <b>0</b>            | 0.84436                | 0.58026            |                  | 0.44592                        | 0.96792             | 0.074                  | 0.20286          |
| 55                                 | E35/M59-F-193-SAT | 3             | 117.2 | 0.039                          | 0.02062             | 0.02582                | 0.7679             |                  | 0.63468                        | 0.7399              | 0.41156                | 0.27846          |
| 56                                 | E35/M59-F-187-SER | 3             | 117.2 | m.d.                           | m.d.                | m.d.                   | m.d.               |                  | m.d.                           | m.d.                | m.d.                   | m.d.             |
| 57                                 | 1A31-F-347-SER    | 3             | 125.1 | 0.01698                        | <b>0.00018</b>      | 0.147                  | 0.7513             |                  | 0.77144                        | 0.97672             | 0.74398                | 0.02274          |
| 58                                 | CO9C-CTA-285-SAT  | 3             | 129.6 | <b>0.0001</b>                  | <b>0.00054</b>      | <b>0.00272</b>         | 0.26918            |                  | 0.99976                        | 0.99824             | 0.99312                | 0.56282          |
| 59                                 | CO9C-TCC-181-SER  | 3             | 130.2 | 0.96934                        | 0.85424             | 0.44506                | 0.98704            |                  | 0.0143                         | 0.05482             | 0.3539                 | <b>0.00282</b>   |
| 60                                 | CO9C-TCC-202-SAT  | 4             | 17.5  | 1                              | 0.99998             | 0.92972                | 0.99698            |                  | <b>0.00002</b>                 | <b>0.00002</b>      | 0.03562                | <b>0.0007</b>    |
| 61                                 | CO9C-GTT-148-SAT  | 4             | 25    | 1                              | 0.99992             | 0.9961                 | 0.99682            |                  | <b>0.00002</b>                 | <b>0.00008</b>      | 0.02252                | <b>0.00064</b>   |
| 62                                 | E35/M59-F-220-SAT | 4             | 36.9  | 0.97268                        | 0.95498             | 0.29876                | 0.99272            |                  | 0.66914                        | 0.1279              | 0.53478                | 0.93116          |
| 63                                 | E35/M59-F-276-SAT | 4             | 49.1  | 1                              | 0.99998             | 0.98722                | 0.99818            |                  | 0.04602                        | 0.04852             | 0.03088                | 0.59904          |
| 64                                 | CO9C-TCC-281-SAT  | 4             | 52.1  | 0.88808                        | 0.82266             | 0.65562                | 0.58932            |                  | 0.11192                        | 0.0986              | 0.23866                | 0.41068          |
| 65                                 | CO9C-ATT-009-SAT  | 4             | 58.8  | 0.99984                        | 0.95816             | 0.99364                | 0.91758            |                  | 0.00512                        | 0.08622             | 0.06316                | 0.03336          |
| 66                                 | CO9C-ATT-010-SAT  | 4             | 60.8  | 0.9985                         | 0.84082             | 0.96684                | 0.96884            |                  | 0.02756                        | 0.264               | 0.18572                | 0.01066          |
| 67                                 | CO9C-GTG-310-SAT  | 4             | 63.4  | 0.95844                        | 0.84226             | 0.68174                | 0.86588            |                  | 0.02584                        | 0.083               | 0.2161                 | 0.0604           |
| 68                                 | E45/M48-F-071-SER | 4             | 75.8  | m.d.                           | m.d.                | m.d.                   | m.d.               |                  | m.d.                           | m.d.                | m.d.                   | m.d.             |
| 69                                 | CO9C-CTT-012-SAT  | 4             | 83.4  | 0.93548                        | 0.33172             | 0.8924                 | 0.95322            |                  | 0.04042                        | 0.51924             | 0.06092                | 0.01746          |
| 70                                 | CO9C-ACT-005-SAT  | 4             | 94.1  | <b>0.00004</b>                 | <b>0.00026</b>      | 0.065                  | 0.01924            |                  | 0.99986                        | 0.99876             | 0.8843                 | 0.94866          |
| 71                                 | CO9C-CTA-102-SAT  | 4             | 100.5 | <b>0.00002</b>                 | <b>0.00002</b>      | <b>0.00002</b>         | <b>0</b>           |                  | 1                              | 1                   | 1                      | 0.99996          |
| 72                                 | CO9C-CTC-001-SAT  | 4             | 102.9 | <b>0.00002</b>                 | <b>0.00002</b>      | <b>0.00032</b>         | <b>0.00006</b>     |                  | 1                              | 1                   | 0.99912                | 0.99994          |
| 73                                 | CO9C-CTC-020-SAT  | 4             | 104.7 | <b>0.00002</b>                 | <b>0.00002</b>      | <b>0.00048</b>         | <b>0.00004</b>     |                  | 1                              | 1                   | 0.99984                | 0.99986          |
| 74                                 | CO9C-CTC-021-SER  | 4             | 106.7 | 0.49074                        | 0.4233              | 0.85344                | 0.05336            |                  | 1                              | 0.99988             | 0.9888                 | 0.94664          |
| 75                                 | CO9C-TCC-167-SER  | 4             | 109.2 | 0.818                          | 0.99468             | 0.59044                | 0.01896            |                  | 0.77918                        | 0.16136             | 0.69604                | 0.92428          |
| 76                                 | 1A31-F-259-SAT    | 4             | 112.2 | <b>0.00002</b>                 | <b>0.00002</b>      | <b>0.00004</b>         | <b>0.00066</b>     |                  | 1                              | 0.99736             | 0.99436                | 0.99568          |

| Number (#) | Marker name                        | Linkage group | cM          | All fields (=Fig. 2)<br>N = 90 | Amsterdam<br>n = 29 | Sijbekarspel<br>n = 40 | Aachen<br>n = 21   |                  | All fields (=Fig. 2)<br>N = 90 | Amsterdam<br>n = 29 | Sijbekarspel<br>n = 40 | Aachen<br>n = 21 |
|------------|------------------------------------|---------------|-------------|--------------------------------|---------------------|------------------------|--------------------|------------------|--------------------------------|---------------------|------------------------|------------------|
|            |                                    |               |             | <i>L. serriola</i>             | <i>L. serriola</i>  | <i>L. serriola</i>     | <i>L. serriola</i> | <i>L. sativa</i> | <i>L. sativa</i>               | <i>L. sativa</i>    | <i>L. sativa</i>       |                  |
|            | Distortion towards preference for: |               |             |                                |                     |                        |                    |                  |                                |                     |                        |                  |
| 77         | CO9C-CTC-010-SER                   | 4             | 153.3       | 0.97346                        | 0.9634              | 0.9469                 | 0.14946            |                  | 0.01246                        | 0.01104             | 0.02                   | 0.55084          |
| 78         | 1A36-F-250-SAT                     | 4             | 157.8       | 0.2076                         | 0.06494             | 0.88782                | 0.02774            |                  | 0.95178                        | 0.89784             | 0.39406                | 0.94184          |
| 79         | CO9C-GTG-193-SAT                   | 4             | 160.5       | 0.3974                         | 0.2752              | 0.5303                 | 0.25044            |                  | 0.51808                        | 0.58382             | 0.34712                | 0.58688          |
| 80         | NBS-24-ser                         | 5             | 0           | 1                              | 0.99996             | 1                      | 0.55056            |                  | 0.1206                         | <b>0.0043</b>       | 0.5591                 | 0.44944          |
| 81         | CO9C-CTC-017-SAT                   | 5             | 3.3         | 0.90514                        | 0.99842             | 0.79468                | 0.00532            |                  | 0.19086                        | <b>0.0004</b>       | 0.44194                | 0.97494          |
| 82         | CO9C-ATC-006-SER                   | 5             | 8.3         | 1                              | 1                   | 1                      | 0.44444            |                  | 0.00482                        | <b>0.00218</b>      | 0.05436                | 0.27             |
| 83         | E44/M48-F-223-SER                  | 5             | 13.5        | 1                              | 0.99996             | 1                      | 0.93604            |                  | <b>0.0008</b>                  | <b>0.00338</b>      | 0.02132                | 0.10896          |
| 84         | <b>CO9C-CTC-004-SER</b>            | <b>5</b>      | <b>18.8</b> | 0.99964                        | 0.99996             | 0.81114                | 0.5126             |                  | <b>0.0036</b>                  | <b>0.00004</b>      | 0.18886                | 0.4874           |
| 85         | CO9C-ACG-005-SER                   | 5             | 22.8        | 0.71038                        | 0.96762             | 0.35268                | 0.08866            |                  | 0.19086                        | 0.0095              | 0.4437                 | 0.6807           |
| 86         | CO9C-AAT-162-SER                   | 5             | 28.4        | 1                              | 1                   | 1                      | 0.59234            |                  | 0.00922                        | 0.09072             | 0.0092                 | 0.19564          |
| 87         | 1A31-F-129-SER                     | 5             | 35.9        | 0.9                            | 0.88142             | 0.82362                | 0.3826             |                  | 0.96534                        | 0.17652             | 0.98768                | 0.8981           |
| 88         | 1A31-F-224-SAT                     | 5             | 43.7        | 0.5228                         | 0.36272             | 0.84554                | 0.10304            |                  | 0.73524                        | 0.07338             | 0.79414                | 0.8971           |
| 89         | CO9C-ATT-014-SER                   | 5             | 46          | 0.32866                        | 0.60896             | 0.34814                | 0.08848            |                  | 0.67134                        | 0.39104             | 0.44798                | 0.6802           |
| 90         | CO9C-CTG-96-SAT                    | 5             | 66          | 0.05606                        | 0.57246             | 0.2155                 | <b>0.00172</b>     |                  | 0.91378                        | 0.2845              | 0.6757                 | 0.99114          |
| 91         | CO9C-ATC-005-SAT                   | 5             | 66.6        | 0.14422                        | 0.43704             | 0.17016                | 0.17218            |                  | 0.89886                        | 0.4114              | 0.7337                 | 0.92102          |
| 92         | CO9C-ATC-002-SER                   | 5             | 70.8        | 0.9933                         | 0.86936             | 0.99878                | 0.15624            |                  | 0.71854                        | 0.43674             | 0.3864                 | 0.84376          |
| 93         | CO9C-ACG-013-SER                   | 5             | 72.6        | 0.99984                        | 0.9984              | 0.99986                | m.d.               |                  | 0.4331                         | 0.1337              | 0.20744                | 0.93284          |
| 94         | CO9C-AAT-200-SAT                   | 5             | 75.6        | 1                              | 1                   | 0.6797                 | 0.9997             |                  | <b>0.00002</b>                 | <b>0.00002</b>      | 0.4551                 | <b>0.00006</b>   |
| 95         | CO9C-ACT-009-SAT                   | 5             | 78.5        | 0.02374                        | 0.0228              | 0.52494                | 0.01956            |                  | 0.99192                        | 0.9772              | 0.60262                | 0.9474           |
| 96         | CO9C-AAT-172-SAT                   | 5             | 84.6        | <b>0.00284</b>                 | 0.02418             | 0.08748                | 0.0419             |                  | 0.9994                         | 0.9971              | 0.8509                 | 0.90106          |
| 97         | 1A36-F-160-SER                     | 5             | 86.7        | 0.95928                        | 0.54902             | 0.96404                | 0.77062            |                  | 0.01564                        | 0.18266             | <b>0.00166</b>         | 0.54762          |
| 98         | E44/M49-F-316-SER                  | 5             | 107.9       | <b>0.00022</b>                 | 0.01674             | <b>0.0001</b>          | 0.39114            |                  | 0.99294                        | 0.86142             | 0.97866                | 0.59438          |
| 99         | E45/M48-F-127-SER                  | 5             | 109.6       | 1                              | 0.99704             | 1                      | 0.92674            |                  | 0.86888                        | 0.57734             | 0.88512                | 0.4019           |
| 100        | E35/M59-F-129-SER                  | 5             | 110.3       | 0.4418                         | 0.55568             | 0.07006                | 0.8095             |                  | 0.24208                        | 0.23978             | 0.5678                 | 0.06282          |
| 101        | CO9C-GTG-111-SAT                   | 5             | 111         | 0.01064                        | 0.31108             | <b>0.00144</b>         | 0.1983             |                  | 0.9967                         | 0.68892             | 0.99958                | 0.6572           |
| 102        | CO9C-GTT-213-SER                   | 5             | 111.5       | 0.42016                        | 0.31038             | 0.3843                 | 0.57738            |                  | 0.57984                        | 0.48708             | 0.6157                 | 0.22402          |
| 103        | CO9C-CTG-178-SAT                   | 5             | 112.8       | <b>0.00002</b>                 | <b>0.00366</b>      | <b>0.00044</b>         | 0.05768            |                  | 0.99994                        | 0.98872             | 0.9985                 | 0.87288          |
| 104        | E35/M59-F-270-SAT                  | 5             | 117.3       | 0.60318                        | 0.49298             | 0.14952                | 0.89604            |                  | 0.9309                         | 0.87468             | 0.87242                | 0.23726          |
| 105        | NBS-10-sat                         | 5             | 120.1       | 0.21646                        | 0.03336             | 0.53586                | 0.38876            |                  | 0.99996                        | 0.98706             | 1                      | 0.61124          |
| 106        | E35/M59-F-178-SER                  | 5             | 126.2       | 0.931                          | 0.70822             | 0.70132                | 0.84444            |                  | 0.96574                        | 0.8667              | 0.96606                | 0.23822          |
| 107        | E35/M59-F-182-SAT                  | 5             | 126.5       | 0.8217                         | 0.72788             | 0.34304                | 0.85012            |                  | 0.99632                        | 0.995               | 0.97298                | 0.26632          |
| 108        | NBS-22-ser                         | 5             | 129         | 0.67044                        | 0.1108              | 0.96832                | 0.29596            |                  | 1                              | 0.99994             | 1                      | 0.70404          |
| 109        | CO9C-AAT-431-SAT                   | 5             | 131.5       | 0.15282                        | 0.68562             | 0.07296                | 0.09382            |                  | 0.78166                        | 0.16136             | 0.86308                | 0.7937           |
| 110        | 1A36-F-156-SER                     | 5             | 133.2       | 0.97552                        | 0.88578             | 0.6945                 | 0.95224            |                  | 0.97878                        | 0.6789              | 0.99036                | 0.4165           |
| 111        | NBS26-sat                          | 5             | 134.3       | m.d.                           | m.d.                | m.d.                   | m.d.               |                  | m.d.                           | m.d.                | m.d.                   | m.d.             |
| 112        | CO9C-AAT-340-SER                   | 5             | 140.2       | 0.3022                         | 0.2283              | 0.35602                | 0.4455             |                  | 0.79836                        | 0.56322             | 0.80832                | 0.31442          |
| 113        | E35/M59-F-198-SAT                  | 5             | 163.9       | 0.00476                        | 0.1491              | 0.02138                | 0.04774            |                  | 0.99762                        | 0.89192             | 0.9952                 | 0.49506          |
| 114        | NBS-07-ser                         | 6             | 7.1         | 1                              | 1                   | 1                      | 0.04824            |                  | 0.69954                        | 0.3524              | 0.45882                | 0.79762          |
| 115        | 1A36-F-304-SAT                     | 6             | 7.8         | 0.62974                        | 0.04938             | 0.95406                | 0.49928            |                  | 0.84464                        | 0.90474             | 0.13564                | 0.94596          |
| 116        | CO9C-ATT-013-SAT                   | 6             | 11.7        | <b>0.00002</b>                 | <b>0.00002</b>      | 0.03318                | 0.0058             |                  | 1                              | 1                   | 0.93418                | 0.98             |
| 117        | CO9C-ACG-004-SER                   | 6             | 40          | 0.12476                        | 0.1528              | 0.74814                | m.d.               |                  | 0.80792                        | 0.6963              | 0.14962                | 0.9903           |

| Number (#) | Marker name       | Linkage group | cM   | All fields (=Fig. 2)<br>N = 90                           | Amsterdam<br>n = 29 | Sijbekarspel<br>n = 40 | Aachen<br>n = 21   |                  | All fields (=Fig. 2)<br>N = 90 | Amsterdam<br>n = 29 | Sijbekarspel<br>n = 40 | Aachen<br>n = 21 |
|------------|-------------------|---------------|------|----------------------------------------------------------|---------------------|------------------------|--------------------|------------------|--------------------------------|---------------------|------------------------|------------------|
|            |                   |               |      | Distortion towards preference for:<br><i>L. serriola</i> | <i>L. serriola</i>  | <i>L. serriola</i>     | <i>L. serriola</i> | <i>L. sativa</i> | <i>L. sativa</i>               | <i>L. sativa</i>    | <i>L. sativa</i>       |                  |
| 118        | CO9C-AAG-005-SER  | 6             | 43.4 | 0.8413                                                   | 0.501               | 0.97846                | 0.0612             |                  | 0.09978                        | 0.29156             | 0.00816                | 0.7576           |
| 119        | E35/M59-F-217-SAT | 6             | 45.1 | 0.9923                                                   | 0.68446             | 0.99078                | 0.82508            |                  | 0.03626                        | 0.20386             | <b>0.00302</b>         | 0.6818           |
| 120        | CO9C-ATT-005-SAT  | 6             | 45.7 | 0.0189                                                   | 0.02426             | 0.38858                | 0.03334            |                  | 0.9811                         | 0.97574             | 0.4867                 | 0.91694          |
| 121        | CO9C-ACG-012-SAT  | 6             | 53.7 | 0.9999                                                   | 0.61792             | 1                      | 0.83964            |                  | <b>0.0001</b>                  | 0.38208             | <b>0.00002</b>         | 0.07552          |
| 122        | CO9C-AAG-008-SAT  | 6             | 55.6 | 0.99914                                                  | 0.41394             | 1                      | 0.49154            |                  | <b>0.0005</b>                  | 0.42962             | <b>0.00002</b>         | 0.32818          |
| 123        | CO9C-CTT-006-SAT  | 6             | 56.6 | 0.99924                                                  | 0.62726             | 0.99946                | 0.9181             |                  | <b>0.00034</b>                 | 0.23426             | <b>0.00018</b>         | 0.03276          |
| 124        | E35/M59-F-103-SAT | 6             | 71.6 | 0.988                                                    | 0.79918             | 0.99716                | 0.328              |                  | 0.4286                         | 0.4027              | 0.08942                | 0.82004          |
| 125        | CO9C-CTC-008-SAT  | 6             | 82.8 | 0.99766                                                  | 0.99494             | 0.99438                | 0.12872            |                  | <b>0.0044</b>                  | <b>0.00176</b>      | 0.0134                 | 0.72584          |
| 126        | CO9C-CTA-253-SER  | 6             | 82.9 | 0.96296                                                  | 0.96748             | 0.93446                | 0.08882            |                  | 0.0187                         | 0.01032             | 0.02538                | 0.686            |
| 127        | CO9C-GTT-155-SER  | 7             | 3.8  | 0.9643                                                   | 0.06278             | 0.99106                | 0.70166            |                  | 0.0357                         | 0.75584             | 0.00894                | 0.11856          |
| 128        | CO9C-CTA-406-SER  | 7             | 4.3  | 0.7421                                                   | 0.09954             | 0.9707                 | m.d.               |                  | 0.15438                        | 0.6621              | 0.00972                | 0.80918          |
| 129        | CO9C-ATA-004-SAT  | 7             | 6.3  | <b>0.00002</b>                                           | <b>0.00014</b>      | 0.02306                | <b>0</b>           |                  | 1                              | 0.99986             | 0.95204                | 0.99996          |
| 130        | E44/M49-F-248-SAT | 7             | 14.2 | m.d.                                                     | m.d.                | m.d.                   | m.d.               |                  | m.d.                           | m.d.                | m.d.                   | m.d.             |
| 131        | 1A36-F-171-SAT    | 7             | 15.3 | 0.8561                                                   | 0.28274             | 0.97878                | 0.25866            |                  | 0.41738                        | 0.47226             | 0.35336                | 0.471            |
| 132        | CO9C-ACG-002-SER  | 7             | 15.6 | 0.29588                                                  | 0.35022             | 0.3295                 | 0.08458            |                  | 0.57624                        | 0.41462             | 0.47002                | 0.6966           |
| 133        | E45/M48-F-142-SAT | 7             | 15.6 | 0.68254                                                  | 0.05154             | 0.94152                | 0.47424            |                  | 0.91718                        | 0.43652             | 0.86074                | 0.92594          |
| 134        | CO9C-CTA-010-SER  | 7             | 15.9 | 0.97602                                                  | 0.53782             | 0.98004                | 0.44704            |                  | 0.01086                        | 0.23842             | 0.0062                 | 0.2723           |
| 135        | CO9C-AAT-098-SAT  | 7             | 25.6 | 0.74194                                                  | 0.72568             | 0.74324                | 0.1717             |                  | 0.41138                        | 0.27432             | 0.36534                | 0.68902          |
| 136        | CO9C-AAG-007-SAT  | 7             | 30.9 | 0.52292                                                  | 0.60998             | 0.86474                | 0.00766            |                  | 0.6396                         | 0.39002             | 0.21722                | 0.97584          |
| 137        | CO9C-ACT-013-SER  | 7             | 40.4 | 0.98566                                                  | 0.9422              | 0.96394                | 0.11586            |                  | 0.0311                         | 0.01894             | 0.0884                 | 0.62178          |
| 138        | NBS-04-sat        | 7             | 42.1 | 0.99344                                                  | 0.93978             | 0.99816                | 0.07578            |                  | 0.91986                        | 0.34076             | 0.95198                | 0.8287           |
| 139        | NBS-16-sat        | 7             | 43.5 | 0.95812                                                  | 0.9425              | 0.9878                 | 0.0144             |                  | 0.89908                        | 0.1117              | 0.95324                | 0.9544           |
| 140        | CO9C-CTG-112-SER  | 7             | 50.6 | 0.18772                                                  | 0.5843              | 0.0535                 | 0.29992            |                  | 0.70318                        | 0.22138             | 0.83878                | 0.42334          |
| 141        | CO9C-ACT-006-SER  | 7             | 60.5 | 1                                                        | 1                   | 1                      | 0.8375             |                  | <b>0.00032</b>                 | <b>0.00248</b>      | <b>0.00446</b>         | 0.1625           |
| 142        | 1A31-F-170-SER    | 7             | 61.6 | 0.00544                                                  | 0.08878             | 0.04344                | 0.06426            |                  | 0.60568                        | 0.12666             | 0.86194                | 0.37524          |
| 143        | E35/M59-F-101-SER | 7             | 63.2 | 0.0131                                                   | 0.05044             | 0.4732                 | <b>0.00238</b>     |                  | 0.99862                        | 0.6583              | 0.98798                | 0.9644           |
| 144        | CO9C-CTT-002-SER  | 7             | 66.8 | 0.6691                                                   | 0.82884             | 0.4002                 | 0.34906            |                  | 0.3309                         | 0.06904             | 0.39532                | 0.65094          |
| 145        | CO9C-ACT-001-SER  | 7             | 68.6 | 0.37412                                                  | 0.69046             | 0.22732                | 0.22588            |                  | 0.50282                        | 0.159               | 0.59344                | 0.5209           |
| 146        | 1A36-F-223-SAT    | 7             | 90.7 | 0.83172                                                  | 0.81784             | 0.68374                | 0.34316            |                  | 0.99988                        | 0.90258             | 0.99564                | 0.94286          |
| 147        | CO9C-ATA-009-SER  | 7             | 97   | 0.0637                                                   | 0.47866             | 0.02014                | 0.12568            |                  | 0.9363                         | 0.28854             | 0.89916                | 0.87432          |
| 148        | CO9C-GTT-270-SAT  | 8             | 0    | 0.32924                                                  | 0.32186             | 0.02094                | 0.97878            |                  | 0.67076                        | 0.5279              | 0.97906                | 0.00698          |
| 149        | CO9C-CTC-014-SER  | 8             | 0.5  | 1                                                        | 1                   | 1                      | 0.96616            |                  | <b>0</b>                       | 0.02796             | <b>0.00038</b>         | 0.00664          |
| 150        | NBS-11-ser        | 8             | 5.1  | 1                                                        | 0.8644              | 1                      | 0.98838            |                  | 0.0235                         | 0.29608             | 0.08032                | 0.01162          |
| 151        | E45/M48-F-067-SER | 8             | 9.5  | m.d.                                                     | m.d.                | m.d.                   | m.d.               |                  | m.d.                           | m.d.                | m.d.                   | m.d.             |
| 152        | E44/M49-F-262-SAT | 8             | 18.4 | 0.99976                                                  | 0.79082             | 0.99882                | 0.95072            |                  | 0.11794                        | 0.20256             | 0.0642                 | 0.4045           |
| 153        | NBS-08-ser        | 8             | 25.6 | 1                                                        | 1                   | 1                      | 0.9906             |                  | <b>0.00002</b>                 | <b>0.00066</b>      | 0.0261                 | 0.0094           |
| 154        | CO9C-CTC-005-SAT  | 8             | 31.5 | 0.97624                                                  | 0.6148              | 0.92752                | 0.92616            |                  | 0.03842                        | 0.24736             | 0.07248                | 0.07384          |
| 155        | CO9C-ATC-009-SER  | 8             | 57.4 | 1                                                        | 1                   | 1                      | 0.99358            |                  | <b>0.00002</b>                 | 0.0066              | <b>0.00002</b>         | 0.00642          |
| 156        | E35/M59-F-153-SAT | 8             | 57.9 | 0.37722                                                  | 0.3492              | 0.86878                | 0.01424            |                  | 0.20048                        | 0.69004             | 0.03988                | 0.2408           |
| 157        | 1A36-F-127-SAT    | 8             | 60.8 | 0.32348                                                  | 0.75226             | 0.46998                | 0.0216             |                  | <b>0.00118</b>                 | 0.02866             | 0.00986                | 0.03582          |
| 158        | CO9C-CTG-370-SAT  | 8             | 64.2 | 0.1419                                                   | 0.34332             | 0.17922                | 0.23724            |                  | 0.80482                        | 0.513               | 0.7266                 | 0.60588          |

| Number (#) | Marker name          | Linkage group | cM    | All fields (=Fig. 2)<br>N = 90     | Amsterdam<br>n = 29 | Sijbekarspel<br>n = 40 | Aachen<br>n = 21   |                    | All fields (=Fig. 2)<br>N = 90 | Amsterdam<br>n = 29 | Sijbekarspel<br>n = 40 | Aachen<br>n = 21 |
|------------|----------------------|---------------|-------|------------------------------------|---------------------|------------------------|--------------------|--------------------|--------------------------------|---------------------|------------------------|------------------|
|            |                      |               |       | Distortion towards preference for: | <i>L. serriola</i>  | <i>L. serriola</i>     | <i>L. serriola</i> | <i>L. serriola</i> | <i>L. sativa</i>               | <i>L. sativa</i>    | <i>L. sativa</i>       | <i>L. sativa</i> |
| 159        | 1A31-F-146-SER       | 8             | 72.1  | 0.00004                            | 0.00298             | 0.00388                | 0.03318            |                    | 0.89142                        | 0.71242             | 0.43868                | 0.84448          |
| 160        | CO9C-ATT-004-SER     | 8             | 79.3  | 1                                  | 0.9987              | 1                      | 0.77708            |                    | 0.00566                        | 0.1257              | 0.00704                | 0.05832          |
| 161        | E44/M48-F-141-SAT    | 8             | 80.6  | 0.39274                            | 0.65808             | 0.71504                | 0.01282            |                    | 0.99962                        | 0.9153              | 0.96768                | 0.83008          |
| 162        | CO9C-CTC-012-SAT     | 8             | 90.2  | 0.99526                            | 0.9055              | 0.88166                | 0.9703             |                    | 0.00258                        | 0.04564             | 0.0651                 | 0.00962          |
| 163        | 1A36-F-323-SAT       | 8             | 128.2 | 0.99946                            | 0.94302             | 0.97956                | 0.96502            |                    | 0.05392                        | 0.03854             | 0.26866                | 0.10664          |
| 164        | CO9C-AAT-248-SAT     | 8             | 133.6 | 0.5894                             | 0.99798             | 0.38352                | 0.00182            |                    | 0.33214                        | 0.00046             | 0.491                  | 0.99174          |
| 165        | E44/M48-F-192-SAT    | 8             | 143.3 | 0.3227                             | 0.95474             | 0.14074                | 0.01394            |                    | 1                              | 0.98102             | 0.99582                | 0.94572          |
| 166        | NBS-02-ser           | 9             | 0     | 1                                  | 0.99156             | 1                      | 0.98596            |                    | 0.00074                        | 0.03946             | 0.009                  | 0.0686           |
| 167        | CO9C-GTG-151-SER     | 9             | 20.3  | 0.89978                            | 0.90998             | 0.8023                 | 0.30824            |                    | 0.06266                        | 0.03738             | 0.1075                 | 0.46128          |
| 168        | CO9C-AAG-003-SAT     | 9             | 24.4  | 1                                  | 0.9966              | 1                      | 0.15824            |                    | 0.00002                        | 0.00086             | 0.00002                | 0.68262          |
| 169        | CO9C-ACT-015-SAT     | 9             | 28.1  | 0.93808                            | 0.92866             | 0.98334                | 0.0231             |                    | 0.06192                        | 0.03228             | 0.01666                | 0.92218          |
| 170        | CO9C-ATC-008-SAT     | 9             | 36.5  | 0.95372                            | 0.50748             | 0.98064                | 0.6197             |                    | 0.07116                        | 0.49252             | 0.0085                 | 0.3803           |
| 171        | 1A36-F-189-SAT       | 9             | 46.4  | 0.85978                            | 0.14538             | 0.97524                | 0.669              |                    | 0.7482                         | 0.76178             | 0.30672                | 0.58408          |
| 172        | CO9C-CTC-002-SAT     | 9             | 49.5  | 0.99582                            | 0.56102             | 0.99428                | 0.93624            |                    | 0.01478                        | 0.62184             | 0.00572                | 0.02304          |
| 173        | CO9C-ATC-001-SAT     | 9             | 53.1  | 0.9277                             | 0.1241              | 0.90656                | 0.982              |                    | 0.11022                        | 0.75438             | 0.04884                | 0.05088          |
| 174        | E44/M49-F-175-SER    | 9             | 60.7  | 0.93704                            | 0.17588             | 0.98024                | 0.87794            |                    | 0.98462                        | 0.8662              | 0.85726                | 0.71882          |
| 175        | CO9C-CTA-098-SER     | 9             | 81.4  | 0.03102                            | 0.354               | 0.05076                | 0.03284            |                    | 0.9875                         | 0.4356              | 0.98626                | 0.84376          |
| 176        | CO9C-CTT-007-SAT     | 9             | 92.6  | 0.1623                             | 0.6347              | 0.06378                | 0.29096            |                    | 0.91858                        | 0.3653              | 0.96708                | 0.5426           |
| 177        | 1A31-F-176-SER       | 9             | 95.6  | m.d.                               | m.d.                | m.d.                   | m.d.               |                    | m.d.                           | m.d.                | m.d.                   | m.d.             |
| 178        | NBS-19-sat           | 9             | 100.2 | 0.95312                            | 0.72018             | 0.90014                | 0.78914            |                    | 0.99992                        | 0.4197              | 1                      | 0.92606          |
| 179        | NBS-25-ser           | 9             | 102.5 | 0.99998                            | 0.9893              | 0.99994                | 0.70212            |                    | 0.54914                        | 0.17822             | 0.9104                 | 0.13442          |
| 180        | CO9C-TCC-123-SER     | 9             | 106.1 | 0.70168                            | 0.70168             | 0.65638                | 0.86894            |                    | 0.76852                        | 0.58888             | 0.70896                | 0.13106          |
| 181        | E35/M59-F-183-SAT    | 9             | 108.1 | 0.38018                            | 0.70582             | 0.01736                | 0.90742            |                    | 0.26104                        | 0.01842             | 0.7562                 | 0.33128          |
| 182        | E35/M59-F-096-SAT    | 9             | 113.1 | 0.48452                            | 0.85478             | 0.06432                | 0.68264            |                    | 0.69168                        | 0.18572             | 0.97866                | 0.14086          |
| 183        | CO9C-ATA-007-SAT     | 9             | 122.5 | 0.1908                             | 0.76596             | 0.03828                | 0.32934            |                    | 0.8092                         | 0.13652             | 0.92706                | 0.67066          |
| 184        | CO9C-AAG-004-SER     | 9             | 127.7 | 0.7229                             | 0.68844             | 0.59126                | 0.48468            |                    | 0.18776                        | 0.16018             | 0.2488                 | 0.27734          |
| 185        | CO9C-ACT-007-SAT     | 9             | 133.4 | 0.00986                            | 0.84532             | 0.00048                | 0.04264            |                    | 0.99014                        | 0.15468             | 0.99858                | 0.8998           |
| 186        | CO9C-ACT-002-SER     | 9             | 137   | 0.07468                            | 0.30256             | 0.17338                | 0.06206            |                    | 0.87718                        | 0.51384             | 0.69716                | 0.80972          |
| 187        | CO9C-ATT-011-SAT     | u             | u     | 0.16024                            | 0.1111              | 0.2142                 | 0.58966            |                    | 0.92136                        | 0.94644             | 0.7858                 | 0.254            |
| 188        | E44/M48-F-212-SER    | u             | u     | m.d.                               | m.d.                | m.d.                   | m.d.               |                    | m.d.                           | m.d.                | m.d.                   | m.d.             |
| 189        | 1A31-F-074-SAT       | u             | u     | 0.03926                            | 0.01466             | 0.1939                 | 0.42384            |                    | 0.9974                         | 0.9543              | 0.88958                | 0.8633           |
| 190        | 1A31-F-244-SAT       | u             | u     | 0.997                              | 0.59188             | 0.97914                | 0.99318            |                    | 0.14716                        | 0.1342              | 0.3289                 | 0.13044          |
| 191        | 1A31-F-323<N>-P2     | u             | u     | 0.76826                            | 0.30302             | 0.43786                | 0.94656            |                    | 0.81542                        | 0.72102             | 0.8947                 | 0.11408          |
| 192        | 1A31-F-402<N>-P2     | u             | u     | m.d.                               | m.d.                | m.d.                   | m.d.               |                    | m.d.                           | m.d.                | m.d.                   | m.d.             |
| 193        | 1A36-F-148<N>-P2     | u             | u     | 0.45044                            | 0.04196             | 0.87182                | 0.44078            |                    | 1                              | 0.97966             | 0.99564                | 0.93962          |
| 194        | 1A36-F-246-SAT       | u             | u     | 0.01552                            | 0.03336             | 0.10996                | 0.13608            |                    | 0.9999                         | 0.93106             | 0.97552                | 0.85572          |
| 195        | 1A36-F-299<N>-P2     | u             | u     | 0.99936                            | 0.91674             | 0.99702                | 0.87806            |                    | 0.01648                        | 0.14598             | 0.02414                | 0.11424          |
| 196        | 1A36-Fb-126.70<N>-P2 | u             | u     | 0.0002                             | 0.00124             | 0.03342                | 0.0591             |                    | 1                              | 0.97898             | 0.99546                | 0.938            |
| 197        | E35/M59-F-086<F>-P2  | u             | u     | 0.28526                            | 0.0422              | 0.7901                 | 0.26748            |                    | 0.99998                        | 0.97846             | 0.99518                | 0.94122          |
| 198        | E35/M59-F-204<F>-P2  | u             | u     | 0.96322                            | 0.18142             | 0.92742                | 0.9938             |                    | 0.35152                        | 0.2918              | 0.7502                 | 0.038            |
| 199        | E35/M59-F-212-SAT    | u             | u     | 0.12998                            | 0.52732             | 0.0296                 | 0.3109             |                    | 0.8866                         | 0.25458             | 0.94808                | 0.62652          |

| Number (#) | Marker name                        | Linkage group | cM | All fields (=Fig. 2)<br>N = 90 | Amsterdam<br>n = 29 | Sijbekarspel<br>n = 40 | Aachen<br>n = 21   |                  | All fields (=Fig. 2)<br>N = 90 | Amsterdam<br>n = 29 | Sijbekarspel<br>n = 40 | Aachen<br>n = 21 |
|------------|------------------------------------|---------------|----|--------------------------------|---------------------|------------------------|--------------------|------------------|--------------------------------|---------------------|------------------------|------------------|
|            |                                    |               |    | <i>L. serriola</i>             | <i>L. serriola</i>  | <i>L. serriola</i>     | <i>L. serriola</i> | <i>L. sativa</i> | <i>L. sativa</i>               | <i>L. sativa</i>    | <i>L. sativa</i>       |                  |
|            | Distortion towards preference for: |               |    |                                |                     |                        |                    |                  |                                |                     |                        |                  |
| 200        | E44/M48-F-328-SAT                  | u             | u  | <b>0.00004</b>                 | 0.05784             | 0.02086                | <b>0.00004</b>     |                  | 0.96892                        | 0.63756             | 0.72706                | 0.96456          |
| 201        | E44/M48-F-403<F>-P2                | u             | u  | 1                              | 1                   | 1                      | 1                  |                  | <b>0.00002</b>                 | <b>0.00002</b>      | <b>0.00002</b>         | <b>0.00008</b>   |
| 202        | E44/M49-F-231<F>-P2                | u             | u  | 1                              | 1                   | 1                      | 1                  |                  | <b>0.00002</b>                 | <b>0.00002</b>      | <b>0.00002</b>         | <b>0.00002</b>   |
| 203        | E44/M49-F-250<F>-P2                | u             | u  | 1                              | 1                   | 1                      | 1                  |                  | <b>0.00002</b>                 | <b>0.00002</b>      | <b>0.00002</b>         | <b>0.00002</b>   |
| 204        | E44/M49-F-337-SAT                  | u             | u  | 0.73638                        | 0.11338             | 0.55966                | 0.98628            |                  | 0.95708                        | 0.6613              | 0.95282                | 0.4388           |
| 205        | E45/M48-F-084<N>-P2                | u             | u  | m.d.                           | m.d.                | m.d.                   | m.d.               |                  | m.d.                           | m.d.                | m.d.                   | m.d.             |
| 206        | E45/M48-F-103-SAT                  | u             | u  | 0.89436                        | 0.92314             | 0.19816                | 0.90892            |                  | 0.27818                        | 0.08718             | 0.43774                | 0.39944          |
| 207        | E45/M48-F-140-SAT                  | u             | u  | 1                              | 0.9962              | 0.99848                | 0.9858             |                  | 0.98436                        | 0.8662              | 0.6991                 | 0.92512          |
| 208        | E45/M48-F-146<F>-P2                | u             | u  | m.d.                           | m.d.                | m.d.                   | m.d.               |                  | m.d.                           | m.d.                | m.d.                   | m.d.             |
| 209        | E45/M48-F-159<F>-P2                | u             | u  | 0.7666                         | 0.84114             | 0.68954                | 0.27314            |                  | 0.99998                        | 0.98014             | 0.99536                | 0.9372           |
| 211        | 1A36-F-434<N>-P1                   | u             | u  | 1                              | 0.9596              | 0.99874                | 0.99418            |                  | 0.09976                        | 0.499               | 0.05506                | 0.11154          |
| 212        | E44/M49-F-150<N>-P1                | u             | u  | m.d.                           | m.d.                | m.d.                   | m.d.               |                  | m.d.                           | m.d.                | m.d.                   | m.d.             |
| 213        | E44/M49-F-447<F>-P1                | u             | u  | m.d.                           | m.d.                | m.d.                   | m.d.               |                  | m.d.                           | m.d.                | m.d.                   | m.d.             |
| 214        | NBS-03-sat                         | u             | u  | 1                              | 0.9985              | 1                      | 0.99838            |                  | <b>0.00046</b>                 | 0.00498             | 0.32056                | <b>0.00036</b>   |
| 215        | NBS-05-sat                         | u             | u  | m.d.                           | m.d.                | m.d.                   | m.d.               |                  | m.d.                           | m.d.                | m.d.                   | m.d.             |
| 216        | NBS-27-sat                         | u             | u  | 1                              | 1                   | 1                      | 1                  |                  | <b>0.00002</b>                 | 0.00538             | 0.0685                 | <b>0.00002</b>   |
| 217        | NBS-36-sat                         | u             | u  | m.d.                           | m.d.                | m.d.                   | m.d.               |                  | m.d.                           | m.d.                | m.d.                   | m.d.             |
| 218        | NBS37-sat                          | u             | u  | m.d.                           | m.d.                | m.d.                   | m.d.               |                  | m.d.                           | m.d.                | m.d.                   | m.d.             |
| 221        | CO9C-AAT-097-SAT                   | u             | u  | 0.21938                        | 0.36288             | 0.08842                | 0.69902            |                  | 0.70908                        | 0.476               | 0.84486                | 0.14818          |
| 222        | CO9C-AAT-153-SAT                   | u             | u  | 0.9999                         | 0.99672             | 0.98276                | 0.88494            |                  | <b>0.00004</b>                 | <b>0.001</b>        | 0.00772                | 0.05022          |
| 223        | CO9C-AAT-180-SAT                   | u             | u  | <b>0.00074</b>                 | 0.69908             | <b>0.00138</b>         | <b>0.00074</b>     |                  | 0.99976                        | 0.61438             | 0.99656                | 0.99694          |
| 224        | CO9C-AAT-208-SAT                   | u             | u  | <b>0.00002</b>                 | 0.0161              | <b>0.00002</b>         | <b>0</b>           |                  | 1                              | 0.9839              | 1                      | 0.99992          |
| 225        | CO9C-ATA-003-SAT                   | u             | u  | 0.99048                        | 0.57446             | 0.8832                 | 0.99666            |                  | 0.01704                        | 0.28518             | 0.06498                | 0.01112          |
| 226        | CO9C-ATT-001-SAT                   | u             | u  | 1                              | 0.6688              | 1                      | 0.9999             |                  | <b>0.00002</b>                 | 0.19978             | <b>0.00002</b>         | <b>0</b>         |
| 227        | CO9C-CTT-003-SAT                   | u             | u  | 0.46296                        | 0.93688             | 0.67188                | <b>0.00122</b>     |                  | 0.45236                        | 0.02748             | 0.22154                | 0.9942           |
| 228        | CO9C-CTT-009-SAT                   | u             | u  | 0.06292                        | 0.11056             | 0.34942                | 0.06584            |                  | 0.90532                        | 0.79472             | 0.52418                | 0.8457           |
| 229        | CO9C-GTG-700-SAT                   | u             | u  | 0.78644                        | 0.22268             | 0.3099                 | 0.99574            |                  | 0.21356                        | 0.65268             | 0.57196                | <b>0.00084</b>   |
| 230        | CO9C-GTT-238-SAT                   | u             | u  | 0.0382                         | 0.07604             | 0.05708                | 0.47356            |                  | 0.9618                         | 0.85418             | 0.94292                | 0.3566           |
| 231        | CO9-C-GTT-440-SAT                  | u             | u  | 0.82486                        | 0.73834             | 0.87318                | 0.14088            |                  | 0.17514                        | 0.1551              | 0.12682                | 0.72958          |
| 232        | CO9C-TCC-088-SAT                   | u             | u  | 0.01166                        | 0.45956             | 0.18262                | <b>0.00014</b>     |                  | 0.97972                        | 0.39628             | 0.72284                | 0.99932          |
| 233        | CO9-C-TCC-146-SAT                  | u             | u  | 0.047                          | 0.00514             | 0.79498                | 0.01886            |                  | 0.92576                        | 0.98312             | 0.12328                | 0.94144          |
| 234        | CO9C-TCC-199-SAT                   | u             | u  | 0.28328                        | 0.734               | 0.1526                 | 0.21486            |                  | 0.64138                        | 0.15994             | 0.75838                | 0.6341           |
| 235        | CO9-C-TCC-640-SAT                  | u             | u  | 0.87604                        | 0.44852             | 0.69796                | 0.94636            |                  | 0.12396                        | 0.39906             | 0.20148                | 0.05364          |
